# Supplementary material for: Protocol for the Tallaght University Hospital Institute for Memory and Cognition-Biobank for Research in Ageing and Neurodegeneration
Source: PubMed Central journal article supplement (PMC10729202; doi:10.1136/bmjopen-2023-077772), 2023-12-08
Supplement: bmjopen-2023-077772.draft_revisions.pdf [file bmjopen-2023-077772.draft_revisions.pdf]

# BMJ Open

BMJ Open is committed to open peer review. As part of this commitment we make the peer review history of every article we publish publicly available.

When an article is published we post the peer reviewers' comments and the authors' responses online. We also post the versions of the paper that were used during peer review. These are the versions that the peer review comments apply to.

The versions of the paper that follow are the versions that were submitted during the peer review process. They are not the versions of record or the final published versions. They should not be cited or distributed as the published version of this manuscript.

BMJ Open is an open access journal and the full, final, typeset and author-corrected version of record of the manuscript is available on our site with no access controls, subscription charges or pay-per-view fees (<http://bmjopen.bmj.com>).

If you have any questions on BMJ Open's open peer review process please email [info.bmjopen@bmj.com](mailto:info.bmjopen@bmj.com)

# BMJ Open

## Tallaght University Hospital Institute for Memory and Cognition – Biobank for Research in Ageing and Neurodegeneration (TIMC-BRAiN): Study Protocol

|                               |                                                                                                                                                                                                                                                                                                                                                                                                                                                                                                                                                                                                                                                                                                                                                                                                                                                                                                                                                                                                                                                                                                                                                                                                                                                                                                                                                                                                                                                                                                                                                                                                                                                                                                                                                                                                                                                                                                                               |
|-------------------------------|-------------------------------------------------------------------------------------------------------------------------------------------------------------------------------------------------------------------------------------------------------------------------------------------------------------------------------------------------------------------------------------------------------------------------------------------------------------------------------------------------------------------------------------------------------------------------------------------------------------------------------------------------------------------------------------------------------------------------------------------------------------------------------------------------------------------------------------------------------------------------------------------------------------------------------------------------------------------------------------------------------------------------------------------------------------------------------------------------------------------------------------------------------------------------------------------------------------------------------------------------------------------------------------------------------------------------------------------------------------------------------------------------------------------------------------------------------------------------------------------------------------------------------------------------------------------------------------------------------------------------------------------------------------------------------------------------------------------------------------------------------------------------------------------------------------------------------------------------------------------------------------------------------------------------------|
| Journal:                      | <i>BMJ Open</i>                                                                                                                                                                                                                                                                                                                                                                                                                                                                                                                                                                                                                                                                                                                                                                                                                                                                                                                                                                                                                                                                                                                                                                                                                                                                                                                                                                                                                                                                                                                                                                                                                                                                                                                                                                                                                                                                                                               |
| Manuscript ID                 | bmjopen-2023-077772                                                                                                                                                                                                                                                                                                                                                                                                                                                                                                                                                                                                                                                                                                                                                                                                                                                                                                                                                                                                                                                                                                                                                                                                                                                                                                                                                                                                                                                                                                                                                                                                                                                                                                                                                                                                                                                                                                           |
| Article Type:                 | Protocol                                                                                                                                                                                                                                                                                                                                                                                                                                                                                                                                                                                                                                                                                                                                                                                                                                                                                                                                                                                                                                                                                                                                                                                                                                                                                                                                                                                                                                                                                                                                                                                                                                                                                                                                                                                                                                                                                                                      |
| Date Submitted by the Author: | 14-Jul-2023                                                                                                                                                                                                                                                                                                                                                                                                                                                                                                                                                                                                                                                                                                                                                                                                                                                                                                                                                                                                                                                                                                                                                                                                                                                                                                                                                                                                                                                                                                                                                                                                                                                                                                                                                                                                                                                                                                                   |
| Complete List of Authors:     | <p>Dyer, Adam; Tallaght University Hospital, Institute of Memory and Cognition; Trinity College Dublin, Department of Medical Gerontology, School of Medicine</p> <p>Dolphin, Helena; Tallaght University Hospital, Institute of Memory and Cognition; Trinity College Dublin, Department of Medical Gerontology, School of Medicine</p> <p>O'Connor, Antoinette; Tallaght University Hospital, Department of Neurology</p> <p>Morrison, Laura; Tallaght University Hospital, Institute of Memory and Cognition; Trinity College Dublin, Department of Medical Gerontology, School of Medicine</p> <p>Sedgwick, Gavin; Tallaght University Hospital, Institute of Memory and Cognition</p> <p>McFeely, Aoife; Tallaght University Hospital, Institute of Memory and Cognition; Trinity College Dublin, Department of Medical Gerontology, School of Medicine</p> <p>Killeen, Emily; Tallaght University Hospital, Institute of Memory and Cognition</p> <p>Gallagher, Conal; Tallaght University Hospital, Institute of Memory and Cognition</p> <p>Davey, Naomi; Tallaght University Hospital, Institute of Memory and Cognition</p> <p>Connolly, Eimear; Tallaght University Hospital, Institute of Memory and Cognition</p> <p>Lyons, Shane; Tallaght University Hospital, Department of Neurology</p> <p>Young, Conor; Tallaght University Hospital, Institute of Memory and Cognition</p> <p>Gaffney, Christine; Tallaght University Hospital, Department of Neurology</p> <p>Ennis, Ruth; Tallaght University Hospital, Institute of Memory and Cognition</p> <p>McHale, Cathy; Tallaght University Hospital, Institute of Memory and Cognition</p> <p>Joseph, Jasmine; Tallaght University Hospital, Institute of Memory and Cognition</p> <p>Knight, Graham; Tallaght University Hospital, Institute of Memory and Cognition</p> <p>Kelly, Emmet; Tallaght University Hospital, Institute of Memory and Cognition</p> |

|           |                                                                                                                                                                                                                                                                                                                                                                                                                                                                                                                                                                                                                                                          |
|-----------|----------------------------------------------------------------------------------------------------------------------------------------------------------------------------------------------------------------------------------------------------------------------------------------------------------------------------------------------------------------------------------------------------------------------------------------------------------------------------------------------------------------------------------------------------------------------------------------------------------------------------------------------------------|
|           | O'Farrelly, Cliona; Trinity College Dublin, Comparative Immunology<br>Bourke, Nollaig M; Trinity College Dublin, Department of Medical<br>Gerontology, School of Medicine<br>Fallon, Aoife; Tallaght University Hospital, Institute of Memory and<br>Cognition; Trinity College Dublin, Department of Medical Gerontology,<br>School of Medicine<br>O'Dowd, Sean; Tallaght University Hospital, Department of Neurology;<br>Trinity College Dublin, Academic Unit of Neurology<br>Kennelly, Sean P; Trinity College Dublin, Department of Medical<br>Gerontology, School of Medicine; Tallaght University Hospital, Institute<br>of Memory and Cognition |
| Keywords: | Dementia < NEUROLOGY, Delirium & cognitive disorders < PSYCHIATRY,<br>GERIATRIC MEDICINE                                                                                                                                                                                                                                                                                                                                                                                                                                                                                                                                                                 |
|           |                                                                                                                                                                                                                                                                                                                                                                                                                                                                                                                                                                                                                                                          |

SCHOLARONE™  
Manuscripts

1  
2  
3 **Tallaght University Hospital Institute for Memory and Cognition – Biobank for Research in**  
4 **Ageing and Neurodegeneration (TIMC-BRAIN): Study Protocol**  
5  
6  
7

8 Adam H Dyer<sup>1-2†</sup>, Helena Dolphin<sup>1-2\*†</sup>, Antoinette O'Connor<sup>3</sup>, Laura Morrison<sup>1-2</sup>, Gavin Sedwick<sup>1</sup>, Aoife  
9 McFeely<sup>1-2</sup>, Emily Killeen<sup>1</sup>, Conal Gallagher<sup>1</sup>, Naomi Davey<sup>1</sup>, Eimear Connolly<sup>1</sup>, Conor Young<sup>1</sup>, Shane  
10 Lyons<sup>3</sup>, Christine Gaffney<sup>3</sup>, Ruth Ennis<sup>1</sup>, Cathy McHale<sup>1</sup>, Jasmine Joseph<sup>1</sup>, Graham Knight<sup>1</sup>, Emmet  
11 Kelly<sup>3</sup>, Cliona O'Farrelly<sup>5</sup>, Nollaig M Bourke<sup>2</sup>, Aoife Fallon<sup>1,2</sup>, Sean O'Dowd<sup>3,4</sup>, & Sean P Kennelly<sup>1,2</sup>  
12  
13  
14  
15  
16

- 17  
18  
19 1. Institute of Memory and Cognition, Tallaght University Hospital, Dublin, Ireland  
20 2. Department of Medical Gerontology, School of Medicine, Trinity College Dublin, Ireland  
21 3. Department of Neurology, Tallaght University Hospital, Dublin, Ireland  
22 4. Academic Unit of Neurology, Trinity College Dublin, Ireland  
23 5. Comparative Immunology, Trinity Biomedical Sciences Institute, Trinity College Dublin,  
24 Ireland  
25  
26  
27  
28  
29

30  
31  
32 †Authors Contributed Equally to This Work  
33

34  
35  
36 \*Corresponding Author

37 Dr Adam Dyer

38 Department of Age-Related Healthcare

39 Tallaght University Hospital

40 Dublin, Ireland

41 E-mail: [dyera@tcd.ie](mailto:dyera@tcd.ie)

42 Telephone: 00353-1-4142000  
43  
44

45  
46  
47 **Running Title:** TIMC-BRAIN Protocol

48  
49  
50  
51 **Key Words:** Alzheimer Disease, Dementia, Cerebrospinal Fluid, Blood-Based Biomarkers,  
52 Neuroimaging  
53

54  
55 **Abstract Word Count:** 299

56  
57 **Main Text Word Count:** 3,898  
58  
59  
60

## Abstract

**Introduction:** Alzheimer's Disease (AD) and other dementias affect >50 million individuals globally and are characterised by broad clinical and biological heterogeneity. Cohort and biobank studies have played a critical role in advancing understanding of disease pathophysiology and in identifying novel diagnostic and treatment approaches. However, further discovery and validation cohorts are required to clarify the real-world utility of new biomarkers, facilitate research into the development of novel therapies and to advance our understanding the clinical heterogeneity and pathobiology of neurodegenerative diseases.

**Methods and Analysis:** The Tallaght University Hospital Institute for Memory and Cognition Biobank for Research in Ageing and Neurodegeneration (TIMC-BRAiN) will recruit 1,000 individuals over 5 years. Participants, who are undergoing diagnostic work-up in the TIMC Memory Assessment and Support Service (TIMC-MASS), will opt to donate clinical data and biological samples into a biobank. All participants will complete a detailed clinical, neuropsychological and dementia severity assessment (including ACE: Addenbrooke's Cognitive Assessment/RBANS: Repeatable Battery for Assessment of Neuropsychological Status/CDR: Clinical Dementia Rating Scale). Participants undergoing venepuncture/lumbar puncture as part of clinical work-up will be offered the opportunity to donate additional blood (serum/plasma/whole blood) and cerebrospinal fluid (CSF) samples for longitudinal storage in the TIMC-BRAIN biobank. Participants are followed at 18-month intervals for repeat clinical and cognitive assessment. Anonymised clinical data and biological samples will be stored securely in a central repository and used to facilitate future studies concerned with advancing with the diagnosis and treatment of neurodegenerative diseases.

**Ethics and Dissemination:** Ethical Approval has been granted by the St James's Hospital (SJH)/Tallaght University Hospital (TUH) Joint Research Ethics Committee (JREC) [Project ID: 2159] which operates in compliance with the European Communities (Clinical Trials on Medicinal Products for Human Use) Regulations 2004 and ICH Good Clinical Practice Guidelines. Findings using TIMC-BRAiN will be published in a timely and open-access fashion.

### Strengths and Limitations of This Study

- TIMC-BRAiN, the first cognitive biobank in Ireland, will prospectively recruit 1,000 individuals undergoing assessment for cognitive symptoms obtaining clinical data and biological samples that will be stored in a comprehensive, secure biobank. This will facilitate future studies aimed at elucidating the underlying disease biology, diagnostic and treatment approaches in cognitive impairment and dementia.
- Comprehensive clinical assessment is based on gold-standard cognitive and neuropsychological assessment, appropriate clinical work-up with final biobank diagnosis adjudicated by multi-disciplinary consensus in accordance with published guidelines with input from geriatric medicine, neurology, radiology, nursing, speech and language therapy, occupational therapy and neuropsychology colleagues.
- Biological samples donated by TIMC-BRAiN participants include serum, plasma, cerebrospinal fluid (including cell-free cerebrospinal fluid and immune cell pellet where diagnostic lumbar puncture performed), whole blood for later genetic analysis and whole blood stored in Cytodelics™ stabiliser. All samples are anonymised stored in a central repository coupled to comprehensive clinical data and are available for future research studies.
- Participants are assessed every 18-months for clinical progression, including progression to established cognitive impairment/dementia in those with early cognitive symptoms and disease severity progression in those with established dementia.
- TIMC-BRAiN is a single-site study, however the Memory Assessment and Support Service (MASS) at Tallaght University Hospital (TUH) accepts national referrals and is the largest MASS in Ireland.

## Introduction

The global prevalence of dementia is expected to sharply increase over the coming decades, affecting >150 million individuals globally by 2050 (1, 2). Recent decades have seen significant advances in our understanding of the neurobiology of dementia, in particular dementia due to Alzheimer's Disease (AD). However, there remains an urgent need to advance understanding of the pathobiology of all dementia syndromes. Such progress will be critical to the discovery of novel diagnostic and prognostic markers, as well as advancing understanding of their real-world utility. In addition, further understanding of clinical and biological phenotypes and underlying pathophysiological processes is an urgent priority for the field to enable better approaches to personalised prevention and treatment, particularly once Disease Modifying Treatments (DMTs) become available.

Neurodegenerative diseases have high degrees of phenotypic, genetic and pathophysiological heterogeneity with traditional diagnostic paradigms centred on late-stage syndromic classification of disease phenotypes (3). Importantly, personalised approaches to clinical-biological classification incorporating comprehensive assessment of clinical phenotype accompanied by the use of appropriate neuro-imaging, biological sampling (such as cerebrospinal fluid (CSF) biomarkers) and further diagnostic tests serves to map observed clinical phenotypes onto known neurobiological substrates (4, 5). An accurate (and timely) diagnosis has important implications for treatment, advance care planning and is valued by those living with neurodegenerative conditions (6, 7).

Many Memory Assessment and Support Services (MASS) use diagnostic biomarkers to assist in the diagnosis and in prognostication of individuals with cognitive impairment. In AD, CSF markers of amyloid and tau pathology are now frequently employed in many MASS (8). Lumbar Puncture [LP] is typically well-tolerated in these settings (9). Additionally, the recent availability of amyloid and tau Positron Emission Tomography (PET) in certain jurisdictions allows non-invasive assessment of AD pathology (10, 11). Progress in the field of biomarker development has not been solely confined to the field of AD. Promising biomarkers that may aid in the diagnosis of other neurodegenerative disorders are also being developed – for instance the identification of isoform-specific tau species in primary

1  
2  
3 tauopathies such as Cortico-Basal Degeneration (CBD) and Progressive Supranuclear Palsy (PSP)  
4 and the detection of alpha-synuclein in CSF by RT-QuIC in prodromal Parkinson's disease and  
5  
6 Dementia with Lewy Bodies (DLB) (12, 13).  
7  
8  
9

10 One of the most exciting advances in the field of neurodegenerative disorders has been the advent of  
11 blood-based biomarkers. At present, blood-based biomarkers— exemplified by research in AD - show  
12 remarkable promise, even in pre-symptomatic disease stages (14-19). These advances will be  
13 accompanied by significant challenges in the implementation and interpretation of these biomarkers in  
14 clinical practice. Importantly, validation of these biomarkers in clinical populations, with consideration  
15 of issues such as renal clearance, medical comorbidity and population-specific norms, will require the  
16 use of large validation cohorts prior to widespread implementation.  
17  
18  
19  
20  
21  
22  
23  
24  
25

26 A key priority in dementia research is understanding clinical and biological phenotypes across the  
27 disease spectrum, which can aid in accurate diagnosis, prognostication and treatment plans for those  
28 affected. For instance, Mild Cognitive Impairment (MCI) is characterised by deficits evident on  
29 neuropsychological testing which do not interfere with day-to-day function and may stabilise, progress  
30 to dementia or even revert to normal cognition over time (20). Around 5-15% of individuals with MCI  
31 progress to dementia annually (21). One of the greatest challenges at present is predicting the  
32 variable disease trajectory in those affected by MCI and there is an urgent need for new clinical,  
33 diagnostic and biological markers that may indicate a greater likelihood of disease progression. Whilst  
34 several notable studies have demonstrated the influence of AD biomarkers on disease progression in  
35 MCI, further studies are needed to establish the optimal use of prognostic markers in individuals with  
36 early cognitive impairment (22)  
37  
38  
39  
40  
41  
42  
43  
44  
45  
46  
47  
48

49 The development of large-scale clinical, imaging, genetic and biological repositories and real-world  
50 clinical cohorts are crucial to the discovery, identification, validation and standardisation of clinical and  
51 biomarker-based assessments for AD and other neurodegenerative conditions (15, 23-26).  
52

53 Longitudinal observational cohort studies are integral to advancing understanding of relationship  
54 between clinical and fluid biomarkers, cognition and clinical progression across all neurodegenerative  
55 diseases, especially as we enter an era of disease modifying therapies (27). The development of  
56  
57  
58  
59  
60



1  
2  
3 further large cohorts is essential in facilitating the translation of biomarker-based discoveries into  
4 clinical practice and further research into the underlying pathobiology and treatment of  
5 neurodegenerative conditions.  
6  
7  
8  
9

10 The Tallaght University Hospital Institute of Memory and Cognition Biobank for Research in Ageing  
11 and Neurodegeneration (TIMC-BRAiN) will create a longitudinal biobank of clinical data and biological  
12 samples in individuals undergoing assessment for memory and cognitive symptoms at TIMC-MASS.  
13  
14

15 This biobank will facilitate research into clinical and biological biomarkers, in addition to research  
16 studies focused on the underlying neurobiology of MCI, dementia and other neurodegenerative  
17 conditions.  
18  
19  
20  
21  
22  
23  
24  
25  
26  
27  
28  
29  
30  
31  
32  
33  
34  
35  
36  
37  
38  
39  
40  
41  
42  
43  
44  
45  
46  
47  
48  
49  
50  
51  
52  
53  
54  
55  
56  
57  
58  
59  
60

## Aims

TIMC-BRAiN is a longitudinal biobanking study commencing in January 2023 that will recruit 1,000 individuals attending the TIMC-MASS for workup and assessment of cognitive symptoms. TIMC-BRAiN will biobank longitudinal clinical and neuroimaging data alongside biological samples. This biobank will serve as a repository for future research studies that seek to (i) advance understanding of disease pathobiology, (ii) evaluate the use of diagnostic and prognostic tests/assessments and (iii) improve precision medicine approaches across neurodegenerative diseases.

The aims of TIMC-BRAIN are as follows:

- To create a clinical data, neuroimaging and biological sample repository from individuals being assessed for concerns relating to cognition at the TIMC MASS.
- To record final diagnosis and comprehensive clinical phenotyping in those recruited - including demographic information, medical history, cardiovascular risk factors, family history, specific cognitive symptoms (for instance episodic memory/autobiographical memory, language, facial recognition, topographical memory), neuropsychological symptoms, mobility/gait, sleep, nutrition, mood, frailty, hearing and vision.
- To record neuroimaging results coupled to clinical data consisting of Magnetic Resonance Imaging (MRI) or Computed Tomography (CT) Brain results with scoring of MRI scans for vascular burden, parietal atrophy and medial temporal lobe atrophy in addition to results of nuclear imaging and other scans performed where clinically appropriate.
- To biobank biological samples including peripheral blood (whole blood for DNA, serum, plasma and whole blood stored in blood stabiliser) and CSF- including both CSF supernatant and cryopreserved immune cells.
- To longitudinally track changes in cognition (via repeat cognitive assessment) and conversion to/progression of dementia at subsequent 18-month follow-up visits, performed alongside routine clinical care.

1  
2  
3 As TIMC-BRAiN is a longitudinal clinical data and biological sample repository, there are no pre-  
4 specified hypotheses to be tested. TIMC-BRAiN will afford a ready clinical and biological repository for  
5 important research questions to be answered in the future and aims to collaborate widely to enable  
6 novel basic biological and translational research aimed at improving diagnosis, prognostication and  
7 treatments for those affected by neurodegenerative diseases.  
8  
9  
10  
11  
12  
13  
14  
15  
16  
17  
18  
19  
20  
21  
22  
23  
24  
25  
26  
27  
28  
29  
30  
31  
32  
33  
34  
35  
36  
37  
38  
39  
40  
41  
42  
43  
44  
45  
46  
47  
48  
49  
50  
51  
52  
53  
54  
55  
56  
57  
58  
59  
60

For peer review only

## Methods

### Study Setting & Design

Tallaght University Hospital (TUH) is a tertiary referral hospital in Dublin, Ireland with a catchment area of nearly 500,000 individuals. The TUH Institute of Memory and Cognition (TIMC) is the largest MASS in Ireland and receives referrals from both TUH catchment and nationally for individuals experiencing cognitive symptoms. Approximately 400-500 patients are assessed annually in the TIMC-MASS. Once referred to the service, patients are assessed in the first instance by an Advanced Nurse Practitioner (ANP). Comprehensive assessment includes detailed neuropsychological assessment, medical assessment, routine blood tests and appropriate neuroimaging before each case is individually discussed at a weekly Multi-Disciplinary Team (MDT) consensus meeting where working diagnosis is discussed and further investigations if needed, are advised.

### Inclusion and Exclusion Criteria

TIMC-BRAiN will recruit participants undergoing assessment in the TIMC-MASS (See Figure 1). TIMC-BRAiN will recruit a diverse cohort including individuals with different levels of cognitive performance - Subjective Memory Concerns (SMCs), Mild Cognitive Impairment (MCI), and dementia - and a representative array of neurodegenerative diseases - to include AD, Lewy Body Disease (LBD), Frontotemporal Dementia (FTD) and other neurodegenerative conditions. In order to reflect a real-world clinical cohort, participants will not be excluded from TIMC-BRAiN based on age or medical comorbidity. However, individuals with severe systemic illness such as malignancy with limited life expectancy, individuals with current significant alcohol or substance misuse or those with current significant psychiatric comorbidity will be excluded from participation.

<Insert Figure 1>

Participants will be provided with a Participant Information Leaflet (PIL) at time of routine clinical assessment in the TIMC and allowed to reflect on whether they wish to donate their

clinical/neuroimaging data and biological samples in the TIMC-BRAiN biobank. Participants are informed that participation is entirely voluntary and will not in any way affect their future clinical care. Potential participants will then be approached after having time to reflect on participation at time of phlebotomy/lumbar puncture by a study investigator/sub-investigator to discuss participation. Figure 1 outlines assessment and recruitment pathway.

### Clinical and neuropsychological Assessment

Clinical and cognitive assessments are performed by an Advance Nurse Practitioner (ANP) as part of routine care at the TIMC – the contents of the TIMC Case Report Form (CRF) are given in Table 1. Information collected includes background/demographic information, medical history, regular medications, hearing and vision, smoking status (yes/no/previous) and family history (detailed in Table 1).

**Table 1. Information Recorded on TIMC-BRAiN Case Report Form [CRF]**

| Item                                                                                                                                                                                                                                                              | Data Recorded                                                                                  |
|-------------------------------------------------------------------------------------------------------------------------------------------------------------------------------------------------------------------------------------------------------------------|------------------------------------------------------------------------------------------------|
| <b>Demographic Information</b>                                                                                                                                                                                                                                    |                                                                                                |
| Age                                                                                                                                                                                                                                                               | Age at Assessment; Years                                                                       |
| Sex                                                                                                                                                                                                                                                               | Biological Sex; Male/Female/Non-Binary                                                         |
| Level of Education                                                                                                                                                                                                                                                | Finished Formal Education; Years                                                               |
| Occupation                                                                                                                                                                                                                                                        | Occupation; Free Text                                                                          |
| Age Retired                                                                                                                                                                                                                                                       | Age at Retirement; Years                                                                       |
| <b>Medical History</b>                                                                                                                                                                                                                                            |                                                                                                |
| Prior Stroke/Transient Ischaemic Attack                                                                                                                                                                                                                           | Yes/No                                                                                         |
| Recurrent Syncope                                                                                                                                                                                                                                                 | Yes/No                                                                                         |
| Diabetes Mellitus (5)                                                                                                                                                                                                                                             | History of/on DM medication; Yes/No                                                            |
| Hypertension                                                                                                                                                                                                                                                      | History of/on antihypertensive medication; Yes/No                                              |
| Hypercholesterolaemia                                                                                                                                                                                                                                             | History of/on anti-lipidaemic medication; Yes/No                                               |
| Ischaemic Heart Disease                                                                                                                                                                                                                                           | Yes/No                                                                                         |
| Alcohol Excess                                                                                                                                                                                                                                                    | Yes/No                                                                                         |
| Epilepsy                                                                                                                                                                                                                                                          | History of/on anti-epileptic medication; Yes/No                                                |
| Concussion/Prior Head Injury                                                                                                                                                                                                                                      | Yes/No                                                                                         |
| History of Malignancy                                                                                                                                                                                                                                             | Yes/No                                                                                         |
| Previous Anxiety                                                                                                                                                                                                                                                  | History of/on anxiolytic medication; Yes/No                                                    |
| Previous Depression                                                                                                                                                                                                                                               | History of/on antidepressant medication; Yes/No                                                |
| Hearing Impairment                                                                                                                                                                                                                                                | Yes/No                                                                                         |
| Vision Impairment                                                                                                                                                                                                                                                 | Yes/No                                                                                         |
| Smoking Status                                                                                                                                                                                                                                                    | Yes/No/Previous Smoker                                                                         |
| Family History                                                                                                                                                                                                                                                    | Memory Difficulties/Dementia/Alzheimer's Disease/ in a 1 <sup>st</sup> degree relative; Yes/No |
| Regular Medications                                                                                                                                                                                                                                               | Medications List; Coded Using Anatomic Therapeutic Classification (ATC) system                 |
| Anosmia                                                                                                                                                                                                                                                           | Yes/No                                                                                         |
| <b>Cognitive Symptoms at Presentation</b>                                                                                                                                                                                                                         |                                                                                                |
| Symptom Duration                                                                                                                                                                                                                                                  | Duration of Symptoms; in Months                                                                |
| Episodic Memory                                                                                                                                                                                                                                                   | Each Item Recorded as Yes/No Indicating Recent Change at Time of Assessment                    |
| <ul style="list-style-type: none"> <li>• Lose Track of Days</li> <li>• Forgetting Appointments</li> <li>• Misplacing Objects</li> <li>• Forgetting to Pay Bills</li> <li>• Forgetting How to Use Appliances</li> <li>• Remembering to Take Medications</li> </ul> |                                                                                                |

|                                                                                                                                                                                        |                                                                                                                                                                                                                                |
|----------------------------------------------------------------------------------------------------------------------------------------------------------------------------------------|--------------------------------------------------------------------------------------------------------------------------------------------------------------------------------------------------------------------------------|
| Autobiographical Memory<br>• Forgetting Past Personal Events                                                                                                                           | Recorded as Yes/No Indicating Recent Change at Time of Assessment                                                                                                                                                              |
| Language<br>• Word-Finding Difficulties<br>• Shrinkage of Vocabulary<br>• Comprehending Speech<br>• Comprehending Written Information<br>• Ability to Engage in Conversations          | Each Item Recorded as Yes/No Indicating Recent Change at Time of Assessment                                                                                                                                                    |
| Recognition<br>• Facial Recognition<br>• Getting Lost in Familiar Areas<br>• Changes in Using Public Transport/Driving                                                                 | Each Item Recorded as Yes/No Indicating Recent Change at Time of Assessment                                                                                                                                                    |
| Informant Concerns<br>• Issues with Cooking<br>• Issues with Orientation<br>• Issues with Driving<br>• Issues with Medication Compliance<br>• Recent Falls                             | Each Item Recorded as Yes/No Indicating Recent Change at Time of Assessment                                                                                                                                                    |
| <b>Cognitive Assessment</b>                                                                                                                                                            |                                                                                                                                                                                                                                |
| RBANS:<br>• Index I (Immediate Memory)<br>• Index II (Visuospatial/Constructional)<br>• Index III (Language)<br>• Index IV (Attention)<br>• Index V (Delayed Memory)<br>• Global Score | Repeatable Battery for Assessment of Neuropsychological Status (RBANS) Unadjusted (Raw) Score and Centile Score Computed (Based on Age/Education) Normalisation using Duff Norms                                               |
| ACE-III<br>• Attention<br>• Memory<br>• Fluency<br>• Language<br>• Visuospatial<br>• Overall Score                                                                                     | Addenbrooke's Cognitive Assessment (ACE-III) if Unable to Complete RBANS Domain and Total Scores Recorded                                                                                                                      |
| CDR<br>• Memory<br>• Orientation<br>• Judgement & Problem Solving<br>• Community Affairs<br>• Home and Hobbies<br>• Personal Care                                                      | Clinical Dementia Rating Scale<br>Global Score and Sum of Boxes Recorded                                                                                                                                                       |
| FAB                                                                                                                                                                                    | Frontal Assessment Battery<br>Total Score Recorded                                                                                                                                                                             |
| AD8 Administered to Informant                                                                                                                                                          | Ascertain-Dementia 8 Questionnaire (Scored from 8)                                                                                                                                                                             |
| CBI-R                                                                                                                                                                                  | Cambridge Behavioural Inventory Revised (CBI-R)                                                                                                                                                                                |
| <b>Mood &amp; Anxiety Assessment</b>                                                                                                                                                   |                                                                                                                                                                                                                                |
| HADS-Depression<br>HADS-Anxiety                                                                                                                                                        | Hospital Anxiety and Depression Scales<br>Total Score Recorded<br>Probable Depression/Anxiety (Score >10) Recorded                                                                                                             |
| <b>Further Clinical Assessment</b>                                                                                                                                                     |                                                                                                                                                                                                                                |
| PSQI                                                                                                                                                                                   | Pittsburgh Sleep Quality Index (0-21)                                                                                                                                                                                          |
| TUG                                                                                                                                                                                    | Timed-Up-And-Go Test; Time to Complete in seconds recorded                                                                                                                                                                     |
| CFS                                                                                                                                                                                    | Clinical Frailty Scale (CFS) to Assess Frailty                                                                                                                                                                                 |
| MNA                                                                                                                                                                                    | Mini Nutritional Assessment Score (0-7: Malnourished; 8-11: At Risk; 12-14: Normal)                                                                                                                                            |
| <b>Neuroimaging</b>                                                                                                                                                                    |                                                                                                                                                                                                                                |
| MRI Brain<br>• Fazekas Score<br>• MTA Score<br>• Koedam Score                                                                                                                          | Adjudicated at MDT Consensus Meeting by a panel of >2 geriatricians/neurologists<br>• Fazekas Score 0-3 for White Matter Disease<br>• Medial Temporal Atrophy (MTA) score 0-4<br>• Koedam Score for Parietal Atrophy score 0-3 |
| CT Brain Results                                                                                                                                                                       | CT Brain results if performed; free text                                                                                                                                                                                       |
| FDG-PET Results                                                                                                                                                                        | FDG-PET results if performed; free text                                                                                                                                                                                        |
| DAT Results                                                                                                                                                                            | DAT scan results if performed; free text                                                                                                                                                                                       |
| <b>Blood Test Results</b>                                                                                                                                                              |                                                                                                                                                                                                                                |
| Haematology Results<br>• Full Blood Count (FBC)                                                                                                                                        | Any abnormalities detected; yes/no                                                                                                                                                                                             |
| Biochemistry & Other Results<br>• Renal Profile<br>• Liver Profile<br>• Bone Profile<br>• HbA1c                                                                                        | Any abnormalities detected; yes/no                                                                                                                                                                                             |

|                                                                                                                                       |                                                                                                                                                                                                                                                                                                                                                                                                                                                                                                                                                                                                                                                                                                    |
|---------------------------------------------------------------------------------------------------------------------------------------|----------------------------------------------------------------------------------------------------------------------------------------------------------------------------------------------------------------------------------------------------------------------------------------------------------------------------------------------------------------------------------------------------------------------------------------------------------------------------------------------------------------------------------------------------------------------------------------------------------------------------------------------------------------------------------------------------|
| <ul style="list-style-type: none"> <li>• Lipid Profile</li> <li>• Micronutrients: Vitamin B12, Folate</li> <li>• Vitamin D</li> </ul> |                                                                                                                                                                                                                                                                                                                                                                                                                                                                                                                                                                                                                                                                                                    |
| <b>Cerebrospinal Fluid Results</b>                                                                                                    |                                                                                                                                                                                                                                                                                                                                                                                                                                                                                                                                                                                                                                                                                                    |
| Diagnostic Lumbar Puncture Results                                                                                                    | All recorded as pg/mL using Roche Elecsys Electrochemiluminescence Assay                                                                                                                                                                                                                                                                                                                                                                                                                                                                                                                                                                                                                           |
| <ul style="list-style-type: none"> <li>• A<math>\beta</math><sub>1-42</sub></li> <li>• T-Tau</li> <li>• P-Tau</li> </ul>              |                                                                                                                                                                                                                                                                                                                                                                                                                                                                                                                                                                                                                                                                                                    |
| <b>Working (Consensus Meeting) Diagnosis</b>                                                                                          |                                                                                                                                                                                                                                                                                                                                                                                                                                                                                                                                                                                                                                                                                                    |
| Working Diagnosis at Weekly MDT Meeting                                                                                               | Free Text                                                                                                                                                                                                                                                                                                                                                                                                                                                                                                                                                                                                                                                                                          |
| <b>Final (Biobank) Diagnosis</b>                                                                                                      |                                                                                                                                                                                                                                                                                                                                                                                                                                                                                                                                                                                                                                                                                                    |
| Final Diagnosis Adjudicated Following all Investigations                                                                              | Functional Status: <ul style="list-style-type: none"> <li>• Subjective Memory Complaints</li> <li>• Mild Cognitive Impairment</li> <li>• Dementia</li> </ul> Aetiological Diagnosis: <ul style="list-style-type: none"> <li>• Alzheimer's Disease (amnestic, behavioural, LPA, CBS, and PCA variants)</li> <li>• Lewy Body Disease</li> <li>• Frontotemporal Dementia (FTD) (bvFTD/ nfvPPA/ svPPA)</li> <li>• FTD overlap syndromes: FTD-ALS/FTD-CBS/FTD-PSP</li> <li>• Corticobasal Syndrome: 4R Tauopathy</li> <li>• Progressive Supranuclear Palsy</li> <li>• Vascular Cognitive Impairment/Dementia</li> <li>• Other Diagnosis [Free Text]</li> <li>• Genetic Diagnosis [Free Text]</li> </ul> |

\*bvFTD: behavioural variant FTD; LPA: Logopenic variant aphasia, CBS: corticobasal syndrome, PCA: Posterior cortical atrophy; nfvPPA: non fluent agrammatic PPA, svFTD: semantic variant FTD; 4R Tau: 4 repeat tauopathy; PPA: primary progressive aphasia

All participants undergo comprehensive clinical history, a multi-domain cognitive assessment and a collateral history is obtained for all participants which specifically examines driving safety, medication compliance in addition to classifying duration and domains of cognitive change. Cognitive symptoms are assessed by recent changes in the following domains: (i) episodic memory, (ii) autobiographical memory (iii) language and (iv) facial recognition/topographical memory. All of these variables are recorded as yes/no to indicate a recent change. Total duration of symptoms (in months) and first predominant symptom is also recorded.

Neuropsychological assessment consists of the Addenbrooke's Cognitive Examination (ACE-III) (28) and Frontal Assessment Battery (FAB) (29) – these items are completed in all participants. Additionally the Repeatable Battery for the Assessment of Neuropsychological Status (RBANS) is performed if possible (30). The Clinical Dementia Rating Scale (CDR) global/sum of boxes is used to assess for dementia severity (31). The Ascertain Dementia 8 (AD8) questionnaire is also routinely administered to informants (32). The Cambridge Behavioural Inventory (CBI) captures recent behavioural changes and cognitive changes and affective symptoms are reported (33).

1  
2  
3 Mood and Anxiety are routinely assessed via the Hospital Anxiety and Depression Scale (HADS)  
4 Anxiety and Depression scales (34). Sleep is assessed via the Pittsburgh Sleep Quality Index (PSQI)  
5 (35). Mobility is assessed by the Timed-Up-And-Go (TUG) test (36). Frailty is assessed via the  
6  
7 Clinical Frailty Scale (CFS) (37) . Nutrition is assessed in all participants using the Mini-Nutritional  
8  
9 Assessment (MNA) (38). The results of all these assessments are recorded in the TIMC-BRAIN Case  
10  
11 Report Form.  
12  
13  
14  
15

## 16 **Neuroimaging**

17  
18  
19  
20 All individuals assessed in the TIMC have an MRI Brain performed, unless contra-indicated. MRI  
21  
22 scans are reviewed at weekly consensus meeting and the following scores applied:  
23  
24  
25

- 26 (i) **Fazekas Score:** grades white matter disease, scored from 0-3 (39)
- 27
- 28 (ii) **Medial Temporal Lobe Atrophy (MTL):** grades mesio-temporal atrophy, scored  
29  
30 from 0-4 (40)
- 31
- 32 (iii) **Parietal Atrophy Score (Koedam Score):** grades parietal atrophy, scored from 0-3  
33  
34 (41)  
35

36  
37  
38 Scores are applied by a panel of at least two consultants in geriatric medicine and neurology. These  
39  
40 scores are recorded in TIMC-BRAiN data repository. Some individuals proceed to having additional  
41  
42 imaging e.g. fluorodeoxyglucose (FDG)-PET or Dopamine Uptake (DaTScan) scans. The outcome of  
43  
44 all relevant imaging is documented within the data repository (See Table 1).  
45  
46

## 47 **Diagnostic Workflow in TIMC-MASS & Final TIMC-BRAIN Diagnosis**

48  
49  
50  
51 All cases, after completion of their clinical, neuropsychological and neuroimaging assessments, are  
52  
53 discussed at a weekly consensus diagnostic meeting. This meeting, led by a consultant  
54  
55 geriatrician/neurologist with expertise in neurodegenerative diseases, determines, where possible, a  
56  
57 working (consensus) diagnosis. Further investigations such as advanced neuroimaging or diagnostic  
58  
59 CSF sampling are recommended in appropriate cases.  
60



1  
2  
3  
4  
5 For individuals recruited into TIMC-BRAIN a separate biobank diagnostic meeting occurs on a bi-  
6 monthly basis. This meeting is convened by the biobank co-ordinator and attended by the biobank co-  
7 ordinator, data manager, research fellows, consultant geriatrician, consultant neurologist and study  
8 sub-investigators. Each case is discussed only after all appropriate clinical  
9 investigations/assessments have taken place and a final “biobank” diagnosis is confirmed reflecting (i)  
10 functional status and (ii) aetiological diagnosis as follows:  
11  
12  
13  
14  
15  
16  
17  
18  
19  
20  
21

22  
23  
24  
25  
26  
27  
28  
29  
30  
31  
32  
33  
34  
35  
36  
37  
38  
39  
40  
41  
42  
43  
44  
45  
46  
47  
48  
49  
50  
51  
52  
53  
54  
55  
56  
57  
58  
59  
60

*Functional status :*

- Subjective Memory Complaints (SMCs): individuals with concerns over cognition/memory symptoms, free from established cognitive impairment on neuropsychological testing
- Mild Cognitive Impairment (MCI): impairments on 1 or more neuropsychological domain [typically 1.5 standard deviation from age/education mean], which do not interfere with day-to-day function. (20)
- Dementia: objective cognitive loss of any domain which is severe enough to cause functional decline in day-to-day activities.

*Aetiological Diagnosis:*

Published consensus criteria are used to classify aetiology as:

- AD (subtyped into amnesic, behavioural, logopenic variant aphasia, corticobasal syndrome, and posterior cortical atrophy variants) (5, 42, 43)
- Lewy Body Disease (44)
- Frontotemporal Dementia (FTD) subtyped into behavioural variant FTD (bvFTD), semantic variant FTD (svFTD), non-fluent agrammatic FTD (nfvFTD) (45) (46). Also, where applicable, include overlap syndromes: FTD-Corticobasal Syndrome (CBS); FTD-PSP (Progressive Supranuclear Palsy); FTD-ALS (Amyotrophic Lateral Sclerosis)
- Corticobasal Syndrome (CBS) – 4R tauopathy (47, 48)
- Progressive Supranuclear Palsy (PSP) (49)
- Vascular Cognitive impairment/Dementia (50)

- Other Diagnosis: This includes individuals with a diagnosis which does not conform to one of the above categories. Details around potential diagnoses will be recorded as free-text by the biobank manager.
- Genetic diagnosis. For the subset of participants with a genetic diagnosis this will also be reordered.

In cases where participants meet criteria for two aetiological diagnosis, e.g. nfvPPA and FTD-PSP, both aetiological diagnoses will be recorded as the final TIMC-BRAIN diagnosis. The biobank co-ordinator is responsible for recording the final biobank diagnosis on the appropriate participants RedCAP diagnostic section (see below under “Data Storage”).

### **Blood and Cerebrospinal Fluid Sampling**

Following informed consent, blood sampling will be performed as part of routine phlebotomy if possible but in certain cases, may need to be performed separately. All blood tests will be obtained between 08:00-12:00 to minimise the risk of diurnal variation on biomarkers and processed on-site at TIMC within 2 hours of blood draw. For TIMC-BRAIN participants, a serum clot activator tube (9mL), two EDTA tubes (9mL each) and a Lithium Heparin (3mL) coated tube are collected. Fasting status will be recorded – however, participants are not asked to fast for the purposes of TIMC-BRAIN participation.

Individuals undergoing diagnostic CSF examination as part of their clinical assessment will be offered the opportunity to donate CSF samples to the TIMC-BRAIN biobank by a study investigator/sub-investigator. LPs are performed between 09:00-12:00 and are carried out in standard aseptic fashion. LPs are performed at the L3-L5 level and manometers are avoided the maximum number of attempts (including change of operator where required) is 3. Diagnostic samples are obtained in the first instance, followed by an additional 5-10mL of CSF in sterile polypropylene tubes for donation to the TIMC-BRAIN biobank. Samples are inverted 3 times and processed on site within 30 minutes of collection.

### Sample Processing for TIMC-BRAIN

See Figure 2 for blood and CSF sample processing protocol. Blood and CSF samples are processed on site at TIMC as soon as possible after collection. 0.5mL of whole blood is pipetted from one of the EDTA tubes and stored in a sterile polypropylene cryovial for later DNA analysis. 1mL of blood is removed from the Lithium Heparin tube and stored in 2 x 0.5mL aliquots with 0.5mL of Cytodelics™ whole blood stabiliser for potential immune cell analysis by flow cytometry (51). Following this, the remaining blood samples (2 x EDTA tubes, 1 x Serum Clot Activator tubes) are centrifuged at 1.8 x g for 10 minutes. Plasma and Serum are subsequently aliquoted in 0.5mL sterile cryovials, labelled with anonymous TIMC-BRAiN participant ID and stored alongside whole blood and Cytodelics™ aliquots at -80°C for future analysis.

< Insert Figure 2 >

CSF samples are centrifuged at 400 x g for 10 minutes at 4°C to pellet immune cells. Cell-free CSF is subsequently aliquoted into 0.5mL sterile cryovials and stored at -80°C for future analysis. The remaining pellet is resuspended in 0.9mL Recovery Cell Culture Freezing Medium (ThermoScientific™) and stored overnight in a Mr Frosty™ Freezing Container at -80°C with aliquots removed and stored separately the following day for future use. This protocol is based on previously published reports examining immune cell composition (52, 53).

### Data Storage

For each participant a unique anonymous TIMC-BRAiN ID will be generated which links clinical/neuroimaging data and biological samples. The clinical and cognitive data obtained will be recorded on a dedicated TIMC-BRAiN CRF once a final biobank diagnosis has been applied. A small subset of variables are also recorded for date of blood/CSF sampling and storage in the biobank on a study Sample Storage Form. The CRF is completed by a study investigator/sub-investigator following final biobank diagnosis and aims to capture all data obtained as part of routine clinical assessment as outlined above. Data will be stored using RedCAP (Research Electronic Data Capture), a web

1  
2  
3 application for building and managing online surveys and databases for research studies. An  
4 institutional RedCAP system, protected by host and institutional firewalls, will be maintained at TUH  
5  
6 by the TIMC-BRAIN study team. Only the Principal Investigator (PI), Study Investigators/Sub-  
7  
8 Investigators and Biobank Manager will have complete access to the TIMC-BRAIN database on  
9  
10 RedCAP. Biological samples which are coded matching the SSF on RedCAP are stored in dedicated  
11  
12 freezer space in the Meath Foundation Laboratory, TUH. As part of the TIMC-BRAiN consent  
13  
14 procedure, participants give permission for storage of data for an initial period of 5 years, which may  
15  
16 be extended indefinitely according to review by the TIMC-BRAIN steering committee.  
17  
18  
19

### 20 **Longitudinal Data**

21  
22  
23  
24 As part of routine care at TIMC participants diagnosed with MCI or dementia are routinely followed up  
25  
26 in post-diagnostic support pathways. As part of this, all participants are regularly reviewed with routine  
27  
28 repeat cognitive/neuropsychological assessment and dementia severity rating at 18-months. This  
29  
30 data will be available for TIMC-BRAiN participants electing to have their clinical data stored in the  
31  
32 TIMC-BRAiN repository. A follow-up CRF will document change in cognitive/neuropsychological test  
33  
34 scores in addition to progression to dementia/progression of dementia severity.  
35  
36  
37

### 38 **Withdrawal Procedure**

39  
40  
41 If a participant wishes to withdraw from the study at any stage, this decision is clearly documented by  
42  
43 the TIMC-BRAIN investigator/sub-investigator in the patient's medical notes and CRF. Participants  
44  
45 clinical data will be fully removed from the RedCAP database including CRF and SSF. Biological  
46  
47 samples donated will be identified by the biobank manager and destroyed. Participants will be  
48  
49 informed that the decision to withdraw from TIMC-BRAiN will not affect their ongoing care.  
50  
51  
52  
53  
54  
55  
56  
57  
58  
59  
60

## Oversight

The TIMC-BRAiN biobank is guided by a steering committee with a full meeting convened four times per year and reviews any requests for collaboration/sample use in addition to reviewing the day-to-day operating procedures of the biobank.

## Data and Sample Access

Applications for access to clinical data/neuroimaging data or biological samples from the TIMC-BRAIN biobank are considered by the Biobank committee and granted for specific reasons. Applications are reviewed once per quarter at the committee meeting and are reviewed, held pending further information/discussion or rejected based on study feasibility or quality, keeping in mind efficient use of the finite sample repository of TIMC-BRAIN and avoiding duplication of research effort. Following request approval, samples and accompanying clinical/neuroimaging data are dispensed to the requesting study team via the Biobank Manager and recorded on the TIMC-BRAIN recruitment log. For transfer of samples and data outside of the host institution (TUH), a Materials Transfer Agreement (MTA) will be generated, reviewed at the Biobank committee meeting and signed by both institutions.

## Public and Patient Involvement

Despite the fact that the majority of older adults presenting to geriatric medicine services are interested in participating in research (54), older adults are typically under-represented in cohort studies and clinical trials, with many imposing arbitrary age-related or medical comorbidity-based cut-offs (55). To ensure the relevance, acceptability and feasibility of the TIMC-BRAiN biobank, feedback on the protocol design was obtained from patient representatives undergoing diagnostic work-up in the TIMC MASS. Additionally, a patient representative sits on the TIMC-BRAiN steering committee which discusses the ongoing use of research samples, questions to be addressed and day-to-day running of the biobank.

## Ethics and Dissemination

Ethical Approval has been granted by the St James's Hospital (SJH)/Tallaght University Hospital(TUH) Joint Research Ethics Committee (JREC) which operates in compliance with the European Communities (Clinical Trials on Medicinal Products for Human Use) Regulations 2004 and ICH Good Clinical Practice Guidelines (Project ID: 2159). Written informed consent will be obtained from all individuals donating clinical/biological samples to TIMC-BRAiN. A data protection impact assessment and review was performed as part of this application at TUH and TIMC-BRAIN is fully compliant with General Data Protection Regulations (GDPR). It is a key priority for the TIMC-BRAIN Biobank that all research performed using the clinical data and biological sample repository is disseminated in a timely and open access fashion.

## Conclusion

Over a five-year period, the TIMC-BRAiN biobank will aim to create a large clinical data and biological sample repository to facilitate basic research aimed at understanding the underlying pathobiology of dementia, the discovery and validation of novel diagnostic and prognostic markers and facilitate research aimed at elucidating potential new treatment options for individuals living with neurodegenerative disease. By creating a central data repository of anonymized clinical data and biological samples, TIMC-BRAiN will enable suitable research questions to be addressed by accessing a ready and comprehensively phenotyped repository. The availability of such a repository will facilitate novel research questions into the underlying aetiology, diagnosis and treatment of neurodegenerative disease and speed-up collaborative research efforts for those living with neurodegenerative disease.

With the advent of new CSF and blood biomarkers in neurodegenerative disease, it is envisaged that TIMC-BRAiN will offer an invaluable resource to research projects aimed at further validating these markers across different populations, and at different stages of the disease process. Crucial to this is the real-world nature of the TIMC-BRAiN cohort, comprised of individuals undergoing diagnostic work-up for early cognitive symptoms or memory complaints. This is crucial to understand the real-world

1  
2  
3 utility of novel biomarkers for neurodegenerative disease as they emerge. Additionally, by providing  
4 basic biomedical researchers with access to anonymized patient blood and CSF samples to readily  
5 use, TIMC-BRAiN aims to act as a catalyst in facilitating new insights into the pathobiology of  
6  
7 neurodegenerative diseases.  
8  
9

### 10 11 12 **Acknowledgements**

13  
14 The authors wish to acknowledge support from the TIMC-MASS clinical and administrative staff.  
15  
16

### 17 18 **Author's Contributions**

19  
20 AHD, HD and SPK are responsible for overall design, administration and conduct of the TIMC-BRAiN  
21 biobank. AHD and HD jointly wrote the manuscript. AOC, LM, GS, AM, EK, CGal, ND, EC, SL, CGaf  
22 RE, CM, JJ, GK, Eke, AF, SOD designed clinical protocols for assessment of participants. AHD, HD,  
23 COF, NMB, SPK designed the laboratory protocols. All authors have read and approved the final  
24 manuscript. All authors were involved in informing the aims and design of the study.  
25  
26  
27  
28  
29  
30  
31

### 32 **Funding**

33  
34 The TIMC-BRAiN Biobank, AHD, HD and SPK are funded by the Meath Foundation, Tallaght  
35 University Hospital. AHD has been awarded the Irish Clinical Academic Training (ICAT) Programme,  
36 supported by the Wellcome Trust and the Health Research Board (Grant Number 203930/B/16/Z), the  
37 Health Service Executive, National Doctors Training and Planning and the Health and Social Care,  
38 Research and Development Division, Northern Ireland.  
39  
40  
41  
42  
43  
44

### 45 **Competing Interests Statement**

46  
47 None Declared  
48  
49

### 50 51 **Patient Consent for Publication**

52  
53 Not Required  
54  
55  
56  
57  
58  
59  
60

## Figure Legends

### **Figure 1. Recruitment Workflow for the Tallaght Institute of Memory and Cognition Biobank for**

**Research in Ageing and Neurodegeneration.** Individuals are referred to the TIMC-Memory Assessment and Support Service (MASS) for concerns over cognition or memory symptoms and are first assessed by an Advanced Nurse Practitioner (ANP) in memory. For TIMC-BRAiN, participants undergoing assessment will be provided with a Patient Information Leaflet (PIL) to consider donating clinical and/or biological samples to the TIMC-BRAiN biobank study. Should individuals wish to participate, they will undergo informed consent and may donate biological samples at time of diagnostic lumbar puncture or alongside routine phlebotomy. Participants are followed-up at 18-months to examine for conversion to examine for clinical progression. TIMC-MASS: Tallaght Institute of Memory and Cognition Memory Assessment and Support Service; ANP: Advanced Nurse Practitioner; PIL: Patient Information Leaflet.

### **Figure 2. Biological Sample Processing for the Tallaght Institute of Memory and Cognition**

**Biobank for Research in Ageing and Neurodegeneration.** Biological samples are obtained either alongside routine phlebotomy (for blood samples) or at time of diagnostic lumbar puncture (for cerebrospinal fluid where performed). EDTA: Ethylene-diamine-tetra-acetic acid; SCA: Serum Clot Activator; LiHep: Lithium Heparin; DNA: CSF: Cerebrospinal fluid.



## References

1. Livingston G, Huntley J, Sommerlad A, Ames D, Ballard C, Banerjee S, et al. Dementia prevention, intervention, and care: 2020 report of the Lancet Commission. *Lancet*. 2020;396(10248):413-46.
2. Satizabal CL, Beiser AS, Chouraki V, Chêne G, Dufouil C, Seshadri S. Incidence of Dementia over Three Decades in the Framingham Heart Study. *N Engl J Med*. 2016;374(6):523-32.
3. Hampel H, Gao P, Cummings J, Toschi N, Thompson PM, Hu Y, et al. The foundation and architecture of precision medicine in neurology and psychiatry. *Trends Neurosci*. 2023.
4. Hampel H, Shaw LM, Aisen P, Chen C, Lleó A, Iwatsubo T, et al. State-of-the-art of lumbar puncture and its place in the journey of patients with Alzheimer's disease. *Alzheimers Dement*. 2022;18(1):159-77.
5. Dubois B, Villain N, Frisoni GB, Rabinovici GD, Sabbagh M, Cappa S, et al. Clinical diagnosis of Alzheimer's disease: recommendations of the International Working Group. *Lancet Neurol*. 2021;20(6):484-96.
6. Briggs R, McHale C, Fitzhenry D, O'Neill D, Kennelly SP. Dementia, disclosing the diagnosis. *Qjm*. 2018;111(4):215-6.
7. Dubois B, Padovani A, Scheltens P, Rossi A, Dell'Agnello G. Timely Diagnosis for Alzheimer's Disease: A Literature Review on Benefits and Challenges. *J Alzheimers Dis*. 2016;49(3):617-31.
8. Largent EA, Grill J, O'Brien K, Wolk D, Harkins K, Karlawish J. Testing for Alzheimer Disease Biomarkers and Disclosing Results Across the Disease Continuum. *Neurology*. 2023.
9. Duits FH, Martinez-Lage P, Paquet C, Engelborghs S, Lleó A, Hausner L, et al. Performance and complications of lumbar puncture in memory clinics: Results of the multicenter lumbar puncture feasibility study. *Alzheimers Dement*. 2016;12(2):154-63.
10. van Maurik IS, Broulikova HM, Mank A, Bakker ED, de Wilde A, Bouwman FH, et al. A more precise diagnosis by means of amyloid PET contributes to delayed institutionalization, lower mortality, and reduced care costs in a tertiary memory clinic setting. *Alzheimers Dement*. 2022.
11. de Wilde A, van der Flier WM, Pelkmans W, Bouwman F, Verwer J, Groot C, et al. Association of Amyloid Positron Emission Tomography With Changes in Diagnosis and Patient Treatment in an Unselected Memory Clinic Cohort: The ABIDE Project. *JAMA Neurol*. 2018;75(9):1062-70.
12. Horie K, Barthélemy NR, Spina S, VandeVrede L, He Y, Paterson RW, et al. CSF tau microtubule-binding region identifies pathological changes in primary tauopathies. *Nat Med*. 2022;28(12):2547-54.
13. Poggiolini I, Gupta V, Lawton M, Lee S, El-Turabi A, Querejeta-Coma A, et al. Diagnostic value of cerebrospinal fluid alpha-synuclein seed quantification in synucleinopathies. *Brain*. 2022;145(2):584-95.
14. Hansson O, Edelmayer RM, Boxer AL, Carrillo MC, Mielke MM, Rabinovici GD, et al. The Alzheimer's Association appropriate use recommendations for blood biomarkers in Alzheimer's disease. *Alzheimers Dement*. 2022;18(12):2669-86.
15. Mattsson N, Palmqvist S, Stomrud E, Vogel J, Hansson O. Staging  $\beta$ -Amyloid Pathology With Amyloid Positron Emission Tomography. *JAMA Neurol*. 2019;76(11):1319-29.
16. Janelidze S, Mattsson N, Palmqvist S, Smith R, Beach TG, Serrano GE, et al. Plasma P-tau181 in Alzheimer's disease: relationship to other biomarkers, differential diagnosis, neuropathology and longitudinal progression to Alzheimer's dementia. *Nat Med*. 2020;26(3):379-86.
17. Ashton NJ, Janelidze S, Mattsson-Carlgrén N, Binette AP, Strandberg O, Brum WS, et al. Differential roles of A $\beta$ 42/40, p-tau231 and p-tau217 for Alzheimer's trial selection and disease monitoring. *Nat Med*. 2022;28(12):2555-62.
18. O'Connor A, Abel E, Benedet AL, Poole T, Ashton N, Weston PSJ, et al. Plasma GFAP in presymptomatic and symptomatic familial Alzheimer's disease: a longitudinal cohort study. *J Neurol Neurosurg Psychiatry*. 2023;94(1):90-2.
19. O'Connor A, Karikari TK, Poole T, Ashton NJ, Lantero Rodriguez J, Khatun A, et al. Plasma phospho-tau181 in presymptomatic and symptomatic familial Alzheimer's disease: a longitudinal cohort study. *Mol Psychiatry*. 2021;26(10):5967-76.
20. Dunne RA, Aarsland D, O'Brien JT, Ballard C, Banerjee S, Fox NC, et al. Mild cognitive impairment: the Manchester consensus. *Age Ageing*. 2021;50(1):72-80.

21. Ward A, Tardiff S, Dye C, Arrighi HM. Rate of conversion from prodromal Alzheimer's disease to Alzheimer's dementia: a systematic review of the literature. *Dement Geriatr Cogn Dis Extra*. 2013;3(1):320-32.
22. Hansson O, Seibyl J, Stomrud E, Zetterberg H, Trojanowski JQ, Bittner T, et al. CSF biomarkers of Alzheimer's disease concord with amyloid- $\beta$  PET and predict clinical progression: A study of fully automated immunoassays in BioFINDER and ADNI cohorts. *Alzheimers Dement*. 2018;14(11):1470-81.
23. Weiner MW, Veitch DP, Aisen PS, Beckett LA, Cairns NJ, Green RC, et al. The Alzheimer's Disease Neuroimaging Initiative: a review of papers published since its inception. *Alzheimers Dement*. 2013;9(5):e111-94.
24. Ashton NJ, Janelidze S, Al Khleifat A, Leuzy A, van der Ende EL, Karikari TK, et al. A multicentre validation study of the diagnostic value of plasma neurofilament light. *Nat Commun*. 2021;12(1):3400.
25. Leuzy A, Janelidze S, Mattsson-Carlgren N, Palmqvist S, Jacobs D, Cicognola C, et al. Comparing the Clinical Utility and Diagnostic Performance of CSF P-Tau181, P-Tau217, and P-Tau231 Assays. *Neurology*. 2021;97(17):e1681-e94.
26. Leuzy A, Smith R, Cullen NC, Strandberg O, Vogel JW, Binette AP, et al. Biomarker-Based Prediction of Longitudinal Tau Positron Emission Tomography in Alzheimer Disease. *JAMA Neurol*. 2022;79(2):149-58.
27. Pavlik VN, Burnham SC, Kass JS, Helmer C, Palmqvist S, Vassilaki M, et al. Connecting Cohorts to Diminish Alzheimer's Disease (CONCORD-AD): A Report of an International Research Collaboration Network. *J Alzheimers Dis*. 2022;85(1):31-45.
28. Bruno D, Schurmann Vignaga S. Addenbrooke's cognitive examination III in the diagnosis of dementia: a critical review. *Neuropsychiatr Dis Treat*. 2019;15:441-7.
29. Dubois B, Slachevsky A, Litvan I, Pillon B. The FAB: a Frontal Assessment Battery at bedside. *Neurology*. 2000;55(11):1621-6.
30. Randolph C, Tierney MC, Mohr E, Chase TN. The Repeatable Battery for the Assessment of Neuropsychological Status (RBANS): preliminary clinical validity. *J Clin Exp Neuropsychol*. 1998;20(3):310-9.
31. Morris JC. The Clinical Dementia Rating (CDR): current version and scoring rules. *Neurology*. 1993;43(11):2412-4.
32. Galvin JE, Roe CM, Powlishta KK, Coats MA, Muich SJ, Grant E, et al. The AD8: a brief informant interview to detect dementia. *Neurology*. 2005;65(4):559-64.
33. Wear HJ, Wedderburn CJ, Mioshi E, Williams-Gray CH, Mason SL, Barker RA, et al. The Cambridge Behavioural Inventory revised. *Dement Neuropsychol*. 2008;2(2):102-7.
34. Zigmond AS, Snaith RP. The hospital anxiety and depression scale. *Acta Psychiatr Scand*. 1983;67(6):361-70.
35. Buysse DJ, Reynolds CF, 3rd, Monk TH, Berman SR, Kupfer DJ. The Pittsburgh Sleep Quality Index: a new instrument for psychiatric practice and research. *Psychiatry Res*. 1989;28(2):193-213.
36. Bohannon RW. Reference values for the timed up and go test: a descriptive meta-analysis. *J Geriatr Phys Ther*. 2006;29(2):64-8.
37. Rockwood K, Song X, MacKnight C, Bergman H, Hogan DB, McDowell I, et al. A global clinical measure of fitness and frailty in elderly people. *Cmaj*. 2005;173(5):489-95.
38. Vellas B, Guigoz Y, Garry PJ, Nourhashemi F, Bennahum D, Lauque S, et al. The Mini Nutritional Assessment (MNA) and its use in grading the nutritional state of elderly patients. *Nutrition*. 1999;15(2):116-22.
39. Fazekas F, Barkhof F, Wahlund LO, Pantoni L, Erkinjuntti T, Scheltens P, et al. CT and MRI rating of white matter lesions. *Cerebrovasc Dis*. 2002;13 Suppl 2:31-6.
40. Duara R, Loewenstein DA, Potter E, Appel J, Greig MT, Urs R, et al. Medial temporal lobe atrophy on MRI scans and the diagnosis of Alzheimer disease. *Neurology*. 2008;71(24):1986-92.
41. Koedam EL, Lehmann M, van der Flier WM, Scheltens P, Pijnenburg YA, Fox N, et al. Visual assessment of posterior atrophy development of a MRI rating scale. *Eur Radiol*. 2011;21(12):2618-25.
42. Crutch SJ, Schott JM, Rabinovici GD, Murray M, Snowden JS, van der Flier WM, et al. Consensus classification of posterior cortical atrophy. *Alzheimers Dement*. 2017;13(8):870-84.
43. Ossenkoppele R, Singleton EH, Groot C, Dijkstra AA, Eikelboom WS, Seeley WW, et al. Research Criteria for the Behavioral Variant of Alzheimer Disease: A Systematic Review and Meta-analysis. *JAMA Neurol*. 2022;79(1):48-60.

- 1  
2  
3 44. McKeith IG, Boeve BF, Dickson DW, Halliday G, Taylor JP, Weintraub D, et al. Diagnosis and  
4 management of dementia with Lewy bodies: Fourth consensus report of the DLB Consortium.  
5 *Neurology*. 2017;89(1):88-100.  
6 45. Rascovsky K, Hodges JR, Knopman D, Mendez MF, Kramer JH, Neuhaus J, et al. Sensitivity  
7 of revised diagnostic criteria for the behavioural variant of frontotemporal dementia. *Brain*.  
8 2011;134(Pt 9):2456-77.  
9 46. Younes K, Borghesani V, Montembeault M, Spina S, Mandelli ML, Welch AE, et al. Right  
10 temporal degeneration and socioemotional semantics: semantic behavioural variant frontotemporal  
11 dementia. *Brain*. 2022;145(11):4080-96.  
12 47. Armstrong MJ, Litvan I, Lang AE, Bak TH, Bhatia KP, Borroni B, et al. Criteria for the  
13 diagnosis of corticobasal degeneration. *Neurology*. 2013;80(5):496-503.  
14 48. Street D, Jabbari E, Costantini A, Jones PS, Holland N, Rittman T, et al. Progression of  
15 atypical parkinsonian syndromes: PROSPECT-M-UK study implications for clinical trials. *Brain*. 2023.  
16 49. Höglinger GU, Respondek G, Stamelou M, Kurz C, Josephs KA, Lang AE, et al. Clinical  
17 diagnosis of progressive supranuclear palsy: The movement disorder society criteria. *Mov Disord*.  
18 2017;32(6):853-64.  
19 50. Sachdev P, Kalaria R, O'Brien J, Skoog I, Alladi S, Black SE, et al. Diagnostic criteria for  
20 vascular cognitive disorders: a VASCOG statement. *Alzheimer Dis Assoc Disord*. 2014;28(3):206-18.  
21 51. Nguyen NA, Huang X, Cabrera LE, Pekkarinen PT, Nowlan K, Strandin T, et al. A  
22 comprehensive assessment of four whole blood stabilizers for flow-cytometric analysis of leukocyte  
23 populations. *Cytometry A*. 2022.  
24 52. Oh H, Leventhal O, Channappa D, Henderson VW, Wyss-Coray T, Lehallier B, et al. Methods  
25 to investigate intrathecal adaptive immunity in neurodegeneration. *Mol Neurodegener*. 2021;16(1):3.  
26 53. Piehl N, van Olst L, Ramakrishnan A, Teregulova V, Simonton B, Zhang Z, et al.  
27 Cerebrospinal fluid immune dysregulation during healthy brain aging and cognitive impairment. *Cell*.  
28 2022;185(26):5028-39.e13.  
29 54. Davey N, Connolly E, McFeely A, Bambrick P, Pope G, Mulcahy R, et al. 286  
30 PERCEPTIONS OF RESEARCH AMONGST OLDER ADULTS. *Age and Ageing*.  
31 2022;51(Supplement\_3).  
32 55. Goodwin VA, Low MSA, Quinn TJ, Cockcroft EJ, Shepherd V, Evans PH, et al. Including  
33 older people in health and social care research: best practice recommendations based on the  
34 INCLUDE framework. *Age and Ageing*. 2023;52(6).  
35  
36  
37  
38  
39  
40  
41  
42  
43  
44  
45  
46  
47  
48  
49  
50  
51  
52  
53  
54  
55  
56  
57  
58  
59  
60

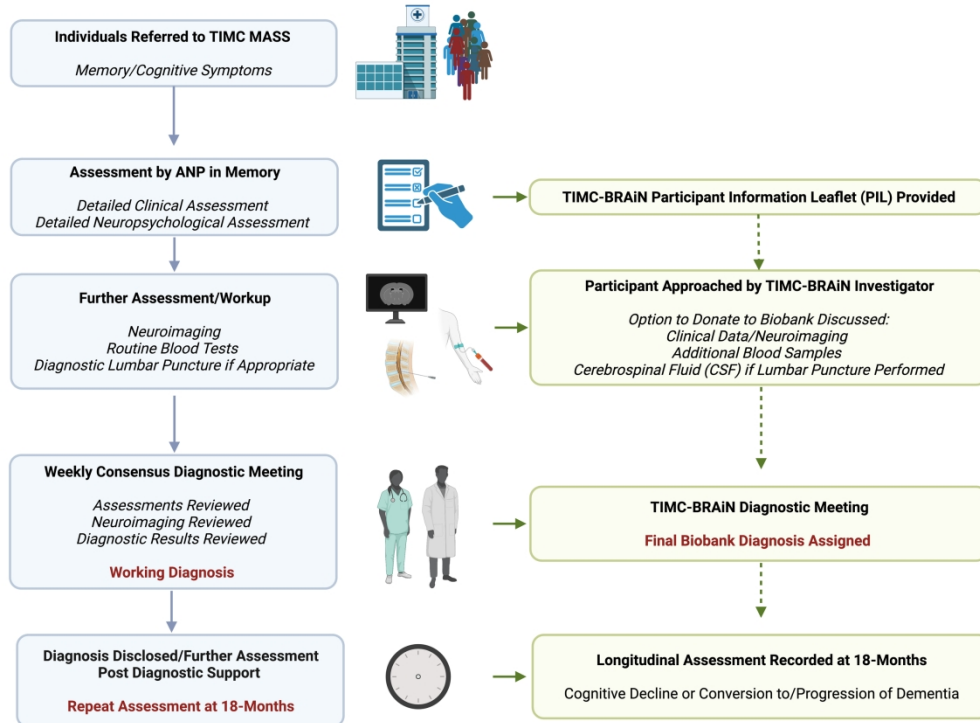

Figure 1. Recruitment Workflow for the Tallaght Institute of Memory and Cognition Biobank for Research in Ageing and Neurodegeneration. Individuals are referred to the TIMC-Memory Assessment and Support Service (MASS) for concerns over cognition or memory symptoms and are first assessed by an Advanced Nurse Practitioner (ANP) in memory. For TIMC-BRAiN, participants undergoing assessment will be provided with a Patient Information Leaflet (PIL) to consider donating clinical and/or biological samples to the TIMC-BRAiN biobank study. Should individuals wish to participate, they will undergo informed consent and may donate biological samples at time of diagnostic lumbar puncture or alongside routine phlebotomy. Participants are followed-up at 18-months to examine for conversion to examine for clinical progression. TIMC-MASS: Tallaght Institute of Memory and Cognition Memory Assessment and Support Service; ANP: Advanced Nurse Practitioner; PIL: Patient Information Leaflet

237x174mm (300 x 300 DPI)

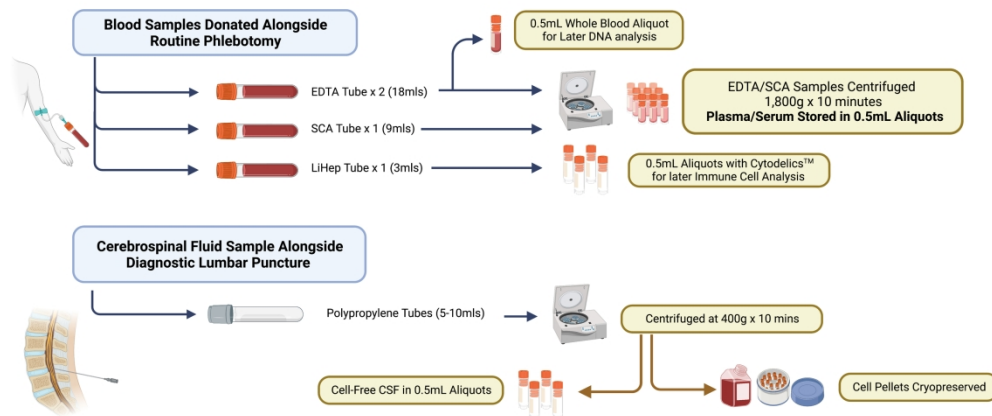

Figure 2. Biological Sample Processing for the Tallaght Institute of Memory and Cognition Biobank for Research in Ageing and Neurodegeneration. Biological samples are obtained either alongside routine phlebotomy (for blood samples) or at time of diagnostic lumbar puncture (for cerebrospinal fluid where performed). EDTA: Ethylene-diamine-tetra-acetic acid; SCA: Serum Clot Activator; LiHep: Lithium Heparin; DNA: CSF: Cerebrospinal fluid.

244x109mm (300 x 300 DPI)

# BMJ Open

## Protocol for the Tallaght University Hospital Institute for Memory and Cognition – Biobank for Research in Ageing and Neurodegeneration (TIMC-BRAiN)

|                               |                                                                                                                                                                                                                                                                                                                                                                                                                                                                                                                                                                                                                                                                                                                                                                                                                                                                                                                                                                                                                                                                                                                                                                                                                                                                                                                                                                                                                                                                                                                                                                                                                                                                                                                                                                                                                                                                                                                               |
|-------------------------------|-------------------------------------------------------------------------------------------------------------------------------------------------------------------------------------------------------------------------------------------------------------------------------------------------------------------------------------------------------------------------------------------------------------------------------------------------------------------------------------------------------------------------------------------------------------------------------------------------------------------------------------------------------------------------------------------------------------------------------------------------------------------------------------------------------------------------------------------------------------------------------------------------------------------------------------------------------------------------------------------------------------------------------------------------------------------------------------------------------------------------------------------------------------------------------------------------------------------------------------------------------------------------------------------------------------------------------------------------------------------------------------------------------------------------------------------------------------------------------------------------------------------------------------------------------------------------------------------------------------------------------------------------------------------------------------------------------------------------------------------------------------------------------------------------------------------------------------------------------------------------------------------------------------------------------|
| Journal:                      | <i>BMJ Open</i>                                                                                                                                                                                                                                                                                                                                                                                                                                                                                                                                                                                                                                                                                                                                                                                                                                                                                                                                                                                                                                                                                                                                                                                                                                                                                                                                                                                                                                                                                                                                                                                                                                                                                                                                                                                                                                                                                                               |
| Manuscript ID                 | bmjopen-2023-077772.R1                                                                                                                                                                                                                                                                                                                                                                                                                                                                                                                                                                                                                                                                                                                                                                                                                                                                                                                                                                                                                                                                                                                                                                                                                                                                                                                                                                                                                                                                                                                                                                                                                                                                                                                                                                                                                                                                                                        |
| Article Type:                 | Protocol                                                                                                                                                                                                                                                                                                                                                                                                                                                                                                                                                                                                                                                                                                                                                                                                                                                                                                                                                                                                                                                                                                                                                                                                                                                                                                                                                                                                                                                                                                                                                                                                                                                                                                                                                                                                                                                                                                                      |
| Date Submitted by the Author: | 03-Nov-2023                                                                                                                                                                                                                                                                                                                                                                                                                                                                                                                                                                                                                                                                                                                                                                                                                                                                                                                                                                                                                                                                                                                                                                                                                                                                                                                                                                                                                                                                                                                                                                                                                                                                                                                                                                                                                                                                                                                   |
| Complete List of Authors:     | <p>Dyer, Adam; Tallaght University Hospital, Institute of Memory and Cognition; Trinity College Dublin, Department of Medical Gerontology, School of Medicine</p> <p>Dolphin, Helena; Tallaght University Hospital, Institute of Memory and Cognition; Trinity College Dublin, Department of Medical Gerontology, School of Medicine</p> <p>O'Connor, Antoinette; Tallaght University Hospital, Department of Neurology</p> <p>Morrison, Laura; Tallaght University Hospital, Institute of Memory and Cognition; Trinity College Dublin, Department of Medical Gerontology, School of Medicine</p> <p>Sedgwick, Gavin; Tallaght University Hospital, Institute of Memory and Cognition</p> <p>McFeely, Aoife; Tallaght University Hospital, Institute of Memory and Cognition; Trinity College Dublin, Department of Medical Gerontology, School of Medicine</p> <p>Killeen, Emily; Tallaght University Hospital, Institute of Memory and Cognition</p> <p>Gallagher, Conal; Tallaght University Hospital, Institute of Memory and Cognition</p> <p>Davey, Naomi; Tallaght University Hospital, Institute of Memory and Cognition</p> <p>Connolly, Eimear; Tallaght University Hospital, Institute of Memory and Cognition</p> <p>Lyons, Shane; Tallaght University Hospital, Department of Neurology</p> <p>Young, Conor; Tallaght University Hospital, Institute of Memory and Cognition</p> <p>Gaffney, Christine; Tallaght University Hospital, Department of Neurology</p> <p>Ennis, Ruth; Tallaght University Hospital, Institute of Memory and Cognition</p> <p>McHale, Cathy; Tallaght University Hospital, Institute of Memory and Cognition</p> <p>Joseph, Jasmine; Tallaght University Hospital, Institute of Memory and Cognition</p> <p>Knight, Graham; Tallaght University Hospital, Institute of Memory and Cognition</p> <p>Kelly, Emmet; Tallaght University Hospital, Institute of Memory and Cognition</p> |

|                                  |                                                                                                                                                                                                                                                                                                                                                                                                                                                                                                                                                                                                                                        |
|----------------------------------|----------------------------------------------------------------------------------------------------------------------------------------------------------------------------------------------------------------------------------------------------------------------------------------------------------------------------------------------------------------------------------------------------------------------------------------------------------------------------------------------------------------------------------------------------------------------------------------------------------------------------------------|
|                                  | O'Farrelly, Cliona; Trinity College Dublin, Comparative Immunology<br>Bourke, Nollaig M; Trinity College Dublin, Department of Medical Gerontology, School of Medicine<br>Fallon, Aoife; Tallaght University Hospital, Institute of Memory and Cognition; Trinity College Dublin, Department of Medical Gerontology, School of Medicine<br>O'Dowd, Sean; Tallaght University Hospital, Department of Neurology; Trinity College Dublin, Academic Unit of Neurology<br>Kennelly, Sean P; Trinity College Dublin, Department of Medical Gerontology, School of Medicine; Tallaght University Hospital, Institute of Memory and Cognition |
| <b>Primary Subject Heading</b> : | Geriatric medicine                                                                                                                                                                                                                                                                                                                                                                                                                                                                                                                                                                                                                     |
| Secondary Subject Heading:       | Neurology                                                                                                                                                                                                                                                                                                                                                                                                                                                                                                                                                                                                                              |
| Keywords:                        | Dementia < NEUROLOGY, Delirium & cognitive disorders < PSYCHIATRY, GERIATRIC MEDICINE                                                                                                                                                                                                                                                                                                                                                                                                                                                                                                                                                  |
|                                  |                                                                                                                                                                                                                                                                                                                                                                                                                                                                                                                                                                                                                                        |

SCHOLARONE™  
Manuscripts

1  
2  
3 **Protocol for the Tallaght University Hospital Institute for Memory and Cognition – Biobank for**  
4 **Research in Ageing and Neurodegeneration (TIMC-BRAIN)**  
5  
6  
7

8 Adam H Dyer<sup>1-2†</sup>, Helena Dolphin<sup>1-2\*†</sup>, Antoinette O'Connor<sup>3</sup>, Laura Morrison<sup>1-2</sup>, Gavin Sedwick<sup>1</sup>, Aoife  
9 McFeely<sup>1-2</sup>, Emily Killeen<sup>1</sup>, Conal Gallagher<sup>1</sup>, Naomi Davey<sup>1</sup>, Eimear Connolly<sup>1</sup>, Conor Young<sup>1</sup>, Shane  
10 Lyons<sup>3</sup>, Christine Gaffney<sup>3</sup>, Ruth Ennis<sup>1</sup>, Cathy McHale<sup>1</sup>, Jasmine Joseph<sup>1</sup>, Graham Knight<sup>1</sup>, Emmet  
11 Kelly<sup>3</sup>, Cliona O'Farrelly<sup>5</sup>, Nollaig M Bourke<sup>2</sup>, Aoife Fallon<sup>1,2</sup>, Sean O'Dowd<sup>3,4</sup>, & Sean P Kennelly<sup>1,2</sup>  
12  
13  
14  
15  
16

- 17  
18  
19  
20  
21  
22  
23  
24  
25  
26  
27  
28  
29  
30  
31
1. Institute of Memory and Cognition, Tallaght University Hospital, Dublin, Ireland
  2. Department of Medical Gerontology, School of Medicine, Trinity College Dublin, Ireland
  3. Department of Neurology, Tallaght University Hospital, Dublin, Ireland
  4. Academic Unit of Neurology, Trinity College Dublin, Ireland
  5. Comparative Immunology, Trinity Biomedical Sciences Institute, Trinity College Dublin, Ireland

32 †Authors Contributed Equally to This Work  
33  
34  
35

36 \*Corresponding Author  
37

38 Dr Adam Dyer  
39

40 Department of Age-Related Healthcare  
41

42 Tallaght University Hospital  
43

44 Dublin, Ireland  
45

46 E-mail: [dyera@tcd.ie](mailto:dyera@tcd.ie)  
47

48 Telephone: 00353-1-4142000  
49

50 **Running Title:** TIMC-BRAIN Protocol

51 **Key Words:** Alzheimer Disease, Dementia, Cerebrospinal Fluid, Blood-Based Biomarkers,  
52 Neuroimaging  
53

54 **Abstract Word Count:** 299  
55

56 **Main Text Word Count:** 4,189  
57  
58  
59  
60



## Abstract

**Introduction:** Alzheimer's Disease (AD) and other dementias affect >50 million individuals globally and are characterised by broad clinical and biological heterogeneity. Cohort and biobank studies have played a critical role in advancing understanding of disease pathophysiology and in identifying novel diagnostic and treatment approaches. However, further discovery and validation cohorts are required to clarify the real-world utility of new biomarkers, facilitate research into the development of novel therapies and to advance our understanding the clinical heterogeneity and pathobiology of neurodegenerative diseases.

**Methods and Analysis:** The Tallaght University Hospital Institute for Memory and Cognition Biobank for Research in Ageing and Neurodegeneration (TIMC-BRAiN) will recruit 1,000 individuals over 5 years. Participants, who are undergoing diagnostic work-up in the TIMC Memory Assessment and Support Service (TIMC-MASS), will opt to donate clinical data and biological samples into a biobank. All participants will complete a detailed clinical, neuropsychological and dementia severity assessment (including ACE: Addenbrooke's Cognitive Assessment/RBANS: Repeatable Battery for Assessment of Neuropsychological Status/CDR: Clinical Dementia Rating Scale). Participants undergoing venepuncture/lumbar puncture as part of clinical work-up will be offered the opportunity to donate additional blood (serum/plasma/whole blood) and cerebrospinal fluid (CSF) samples for longitudinal storage in the TIMC-BRAIN biobank. Participants are followed at 18-month intervals for repeat clinical and cognitive assessment. Anonymised clinical data and biological samples will be stored securely in a central repository and used to facilitate future studies concerned with advancing with the diagnosis and treatment of neurodegenerative diseases.

**Ethics and Dissemination:** Ethical Approval has been granted by the St James's Hospital (SJH)/Tallaght University Hospital (TUH) Joint Research Ethics Committee (JREC) [Project ID: 2159] which operates in compliance with the European Communities (Clinical Trials on Medicinal Products for Human Use) Regulations 2004 and ICH Good Clinical Practice Guidelines. Findings using TIMC-BRAiN will be published in a timely and open-access fashion.

### Strengths and Limitations of This Study

- TIMC-BRAiN will prospectively recruit 1,000 individuals undergoing assessment for cognitive symptoms obtaining comprehensive clinical data and biological samples that will be stored in a secure biobank offering a bioresource for future studies into the diagnosis, pathogenesis and management of individuals with cognitive or memory disorders
- A key strength of TIMC-BRAiN is the comprehensive neuropsychological data recorded, the extensive data capture at time of routine clinical assessment paired with biological sampling (including blood and CSF) all conducted in a routine memory assessment and support service – offering a repository of real-world patient samples and data for future studies.
- A further strength is the longitudinal follow-up conducted as routine every 18-months for clinical progression, including progression to established cognitive impairment/dementia in those with early cognitive symptoms and disease severity progression in those with established dementia.
- A key limitation of TIMC-BRAiN is that it is a single-site study, however the Memory Assessment and Support Service (MASS) at Tallaght University Hospital (TUH) accepts national referrals and is the largest MASS in the Republic of Ireland.

## Introduction

The global prevalence of dementia is expected to sharply increase over the coming decades, affecting >150 million individuals globally by 2050 (1, 2). Recent decades have seen significant advances in our understanding of the neurobiology of dementia, in particular dementia due to Alzheimer's Disease (AD). However, there remains an urgent need to advance understanding of the pathobiology of all dementia syndromes. Such progress will be critical to the discovery of novel diagnostic and prognostic markers, as well as advancing understanding of their real-world utility. In addition, further understanding of clinical and biological phenotypes and underlying pathophysiological processes is an urgent priority for the field to enable better approaches to personalised prevention and treatment, particularly once Disease Modifying Treatments (DMTs) become available.

Neurodegenerative diseases have high degrees of phenotypic, genetic and pathophysiological heterogeneity with traditional diagnostic paradigms centred on late-stage syndromic classification of disease phenotypes (3). Importantly, personalised approaches to clinical-biological classification incorporating comprehensive assessment of clinical phenotype accompanied by the use of appropriate neuro-imaging, biological sampling (such as cerebrospinal fluid (CSF) biomarkers) and further diagnostic tests serves to map observed clinical phenotypes onto known neurobiological substrates (4, 5). An accurate (and timely) diagnosis has important implications for treatment, advance care planning and is valued by those living with neurodegenerative conditions (6, 7).

Many Memory Assessment and Support Services (MASS) use diagnostic biomarkers to assist in the diagnosis and in prognostication of individuals with cognitive impairment. In AD, CSF markers of amyloid and tau pathology are now frequently employed in many MASS (8). Lumbar Puncture [LP] is typically well-tolerated in these settings (9). Additionally, the recent availability of amyloid and tau Positron Emission Tomography (PET) in certain jurisdictions allows non-invasive assessment of AD pathology (10, 11). Progress in the field of biomarker development has not been solely confined to the field of AD. Promising biomarkers that may aid in the diagnosis of other neurodegenerative disorders are also being developed – for instance the identification of isoform-specific tau species in primary

1  
2  
3 tauopathies such as Cortico-Basal Degeneration (CBD) and Progressive Supranuclear Palsy (PSP)  
4 and the detection of alpha-synuclein in CSF by RT-QuIC in prodromal Parkinson's disease and  
5  
6 Dementia with Lewy Bodies (DLB) (12, 13).  
7  
8  
9

10 One of the most exciting advances in the field of neurodegenerative disorders has been the advent of  
11 blood-based biomarkers. At present, blood-based biomarkers— exemplified by research in AD - show  
12 remarkable promise, even in pre-symptomatic disease stages (14-19). These advances will be  
13 accompanied by significant challenges in the implementation and interpretation of these biomarkers in  
14 clinical practice. Importantly, validation of these biomarkers in clinical populations, with consideration  
15 of issues such as renal clearance, medical comorbidity and population-specific norms, will require the  
16 use of large validation cohorts prior to widespread implementation.  
17  
18  
19  
20  
21  
22  
23  
24  
25

26 A key priority in dementia research is understanding clinical and biological phenotypes across the  
27 disease spectrum, which can aid in accurate diagnosis, prognostication and treatment plans for those  
28 affected. For instance, Mild Cognitive Impairment (MCI) is characterised by deficits evident on  
29 neuropsychological testing which do not interfere with day-to-day function and may stabilise, progress  
30 to dementia or even revert to normal cognition over time (20). Around 5-15% of individuals with MCI  
31 progress to dementia annually (21). One of the greatest challenges at present is predicting the  
32 variable disease trajectory in those affected by MCI and there is an urgent need for new clinical,  
33 diagnostic and biological markers that may indicate a greater likelihood of disease progression. Whilst  
34 several notable studies have demonstrated the influence of AD biomarkers on disease progression in  
35 MCI, further studies are needed to establish the optimal use of prognostic markers in individuals with  
36 early cognitive impairment (22)  
37  
38  
39  
40  
41  
42  
43  
44  
45  
46  
47  
48

49 The development of large-scale clinical, imaging, genetic and biological repositories and real-world  
50 clinical cohorts are crucial to the discovery, identification, validation and standardisation of clinical and  
51 biomarker-based assessments for AD and other neurodegenerative conditions (15, 23-26).  
52

53 Longitudinal observational cohort studies are integral to advancing understanding of relationship  
54 between clinical and fluid biomarkers, cognition and clinical progression across all neurodegenerative  
55 diseases, especially as we enter an era of disease modifying therapies (27). The development of  
56  
57  
58  
59  
60

1  
2  
3 further large cohorts is essential in facilitating the translation of biomarker-based discoveries into  
4 clinical practice and further research into the underlying pathobiology and treatment of  
5 neurodegenerative conditions.  
6  
7  
8  
9

10 The Tallaght University Hospital Institute of Memory and Cognition Biobank for Research in Ageing  
11 and Neurodegeneration (TIMC-BRAiN) will create a longitudinal biobank of clinical data and biological  
12 samples in individuals undergoing assessment for memory and cognitive symptoms at TIMC-MASS.  
13  
14

15 This biobank will facilitate research into clinical and biological biomarkers, in addition to research  
16 studies focused on the underlying neurobiology of MCI, dementia and other neurodegenerative  
17 conditions.  
18  
19  
20  
21  
22  
23  
24  
25  
26  
27  
28  
29  
30  
31  
32  
33  
34  
35  
36  
37  
38  
39  
40  
41  
42  
43  
44  
45  
46  
47  
48  
49  
50  
51  
52  
53  
54  
55  
56  
57  
58  
59  
60

## Aims

TIMC-BRAiN is a longitudinal biobanking study commencing in January 2023 that will recruit 1,000 individuals attending the TIMC-MASS for workup and assessment of cognitive symptoms. TIMC-BRAiN will biobank longitudinal clinical and neuroimaging data alongside biological samples. This biobank will serve as a repository for future research studies that seek to (i) advance understanding of disease pathobiology, (ii) evaluate the use of diagnostic and prognostic tests/assessments and (iii) improve precision medicine approaches across neurodegenerative diseases.

The aims of TIMC-BRAIN are as follows:

- To create a clinical data, neuroimaging and biological sample repository from individuals being assessed for concerns relating to cognition at the TIMC MASS.
- To record final diagnosis and comprehensive clinical phenotyping in those recruited - including demographic information, medical history, cardiovascular risk factors, family history, specific cognitive symptoms (for instance episodic memory/autobiographical memory, language, facial recognition, topographical memory), neuropsychological symptoms, mobility/gait, sleep, nutrition, mood, frailty, hearing and vision.
- To record neuroimaging results coupled to clinical data consisting of Magnetic Resonance Imaging (MRI) or Computed Tomography (CT) Brain results with scoring of MRI scans for vascular burden, parietal atrophy and medial temporal lobe atrophy in addition to results of nuclear imaging and other scans performed where clinically appropriate.
- To biobank biological samples including peripheral blood (whole blood for DNA, serum, plasma and whole blood stored in blood stabiliser) and CSF- including both CSF supernatant and cryopreserved immune cells.
- To longitudinally track changes in cognition (via repeat cognitive assessment) and conversion to/progression of dementia at subsequent 18-month follow-up visits, performed alongside routine clinical care.

1  
2  
3 As TIMC-BRAiN is a longitudinal clinical data and biological sample repository, there are no pre-  
4 specified hypotheses to be tested. TIMC-BRAiN will afford a ready clinical and biological repository for  
5 important research questions to be answered in the future and aims to collaborate widely to enable  
6 novel basic biological and translational research aimed at improving diagnosis, prognostication and  
7 treatments for those affected by neurodegenerative diseases.  
8  
9  
10  
11  
12  
13  
14  
15  
16  
17  
18  
19  
20  
21  
22  
23  
24  
25  
26  
27  
28  
29  
30  
31  
32  
33  
34  
35  
36  
37  
38  
39  
40  
41  
42  
43  
44  
45  
46  
47  
48  
49  
50  
51  
52  
53  
54  
55  
56  
57  
58  
59  
60

For peer review only

## Methods

### Study Setting & Design

Tallaght University Hospital (TUH) is a tertiary referral hospital in Dublin, Ireland with a catchment area of nearly 500,000 individuals. The TUH Institute of Memory and Cognition (TIMC) is the largest MASS in the Republic of Ireland and receives referrals from both TUH catchment and nationally for individuals experiencing cognitive symptoms. Approximately 400-500 patients are assessed annually in the TIMC-MASS. Once referred to the service, patients are assessed in the first instance by an Advanced Nurse Practitioner (ANP). Comprehensive assessment includes detailed neuropsychological assessment, medical assessment, routine blood tests and appropriate neuroimaging before each case is individually discussed at a weekly Multi-Disciplinary Team (MDT) consensus meeting where working diagnosis is discussed and further investigations if needed, are advised. We anticipate that TIMC-BRAiN will recruit approximately 200 individuals per year to donate clinical data and biological samples, with an estimated 100 of these coming from the roughly 150 individuals who undergo routine diagnostic lumbar puncture annually (paired CSF and blood) and 100 individuals undergoing assessment without lumbar puncture (blood only) from the roughly 250 assessed annually in our unit.

### Inclusion and Exclusion Criteria

TIMC-BRAiN will recruit participants undergoing assessment and workup in the TIMC-MASS (See Figure 1) who are willing to provide biological samples for research. TIMC-BRAiN will recruit a diverse cohort including individuals with different levels of cognitive performance - Subjective Memory Concerns (SMCs), Mild Cognitive Impairment (MCI), and dementia - and a representative array of neurodegenerative diseases - to include AD, Lewy Body Disease (LBD), Frontotemporal Dementia (FTD) and other neurodegenerative conditions. In order to reflect a real-world clinical cohort, participants will not be excluded from TIMC-BRAiN based on age or medical comorbidity. However, individuals with severe systemic illness such as malignancy with limited life expectancy, individuals



1  
2  
3 with current significant alcohol or substance misuse or those with current significant psychiatric  
4 comorbidity will be excluded from participation.  
5  
6  
7

8  
9 <Insert Figure 1>  
10

11  
12 Participants will be provided with a Participant Information Leaflet (PIL) at time of routine clinical  
13 assessment with the ANP in the TIMC and allowed to reflect on whether they wish to donate their  
14 clinical/neuroimaging data and biological samples in the TIMC-BRAiN biobank. Participants are  
15 informed that participation is entirely voluntary and will not in any way affect their future clinical care.  
16 For those undergoing lumbar puncture, participants are approached by a TIMC-BRAiN  
17 investigator/sub-investigator at time of procedure to assess whether they wish their clinical data  
18 (obtained at time of assessment with the ANP) or biological samples to be included in the biobank.  
19 For those not undergoing lumbar puncture, a separate appointment for phlebotomy only is arranged if  
20 individuals wish to part-take and have their clinical data and biological samples (blood) bio-banked.  
21 Phlebotomy is incorporated alongside routine phlebotomy where possible to minimise venepuncture.  
22 Figure 1 outlines assessment and recruitment pathway. Investigators and Sub-Investigators consist of  
23 medical staff (Specialist Registrars, Clinical Fellows and Consultants in Geriatric Medicine and  
24 Neurology) who are part of the TIMC and are involved in providing clinical care. It is emphasised to  
25 individual participants that their willingness to take part (or not) in TIMC BRAiN does not affect their  
26 clinical care in any way.  
27  
28  
29  
30  
31  
32  
33  
34  
35  
36  
37  
38  
39  
40  
41  
42  
43  
44  
45  
46  
47  
48  
49  
50  
51  
52  
53  
54  
55  
56  
57  
58  
59  
60

### **Clinical and neuropsychological Assessment**

47 Clinical and cognitive assessments are performed by an Advance Nurse Practitioner (ANP) as part of  
48 routine care at the TIMC – the contents of the TIMC Case Report Form (CRF) are given in Table 1.  
49 Information collected includes background/demographic information, medical history, regular  
50 medications, hearing and vision, smoking status (yes/no/previous) and family history (detailed in  
51 Table 1).  
52  
53  
54  
55  
56  
57  
58  
59  
60

Table 1. Information Recorded on TIMC-BRAiN Case Report Form [CRF]

| Item                                                                                                                                                                                                                                                                              | Data Recorded                                                                                                                                                                    |
|-----------------------------------------------------------------------------------------------------------------------------------------------------------------------------------------------------------------------------------------------------------------------------------|----------------------------------------------------------------------------------------------------------------------------------------------------------------------------------|
| <b>Demographic Information</b>                                                                                                                                                                                                                                                    |                                                                                                                                                                                  |
| Age                                                                                                                                                                                                                                                                               | Age at Assessment; Years                                                                                                                                                         |
| Sex                                                                                                                                                                                                                                                                               | Biological Sex; Male/Female/Non-Binary                                                                                                                                           |
| Level of Education                                                                                                                                                                                                                                                                | Finished Formal Education; Years                                                                                                                                                 |
| Occupation                                                                                                                                                                                                                                                                        | Occupation; Free Text                                                                                                                                                            |
| Age Retired                                                                                                                                                                                                                                                                       | Age at Retirement; Years                                                                                                                                                         |
| Marital Status                                                                                                                                                                                                                                                                    | Non-Married/Married/Divorced/Widowed                                                                                                                                             |
| Driving Status                                                                                                                                                                                                                                                                    | Currently Driving/Ceased Driving/Never Drove                                                                                                                                     |
| <b>Medical History</b>                                                                                                                                                                                                                                                            |                                                                                                                                                                                  |
| Prior Stroke/Transient Ischaemic Attack                                                                                                                                                                                                                                           | Yes/No                                                                                                                                                                           |
| Recurrent Syncope                                                                                                                                                                                                                                                                 | Yes/No                                                                                                                                                                           |
| Diabetes Mellitus (5)                                                                                                                                                                                                                                                             | History of/on DM medication; Yes/No                                                                                                                                              |
| Hypertension                                                                                                                                                                                                                                                                      | History of/on antihypertensive medication; Yes/No                                                                                                                                |
| Hypercholesterolaemia                                                                                                                                                                                                                                                             | History of/on anti-lipidaemic medication; Yes/No                                                                                                                                 |
| Ischaemic Heart Disease                                                                                                                                                                                                                                                           | Yes/No                                                                                                                                                                           |
| Alcohol Excess                                                                                                                                                                                                                                                                    | Yes/No                                                                                                                                                                           |
| Epilepsy                                                                                                                                                                                                                                                                          | History of/on anti-epileptic medication; Yes/No                                                                                                                                  |
| Concussion/Prior Head Injury                                                                                                                                                                                                                                                      | Yes/No                                                                                                                                                                           |
| History of Malignancy                                                                                                                                                                                                                                                             | Yes/No                                                                                                                                                                           |
| Previous Anxiety                                                                                                                                                                                                                                                                  | History of/on anxiolytic medication; Yes/No                                                                                                                                      |
| Previous Depression                                                                                                                                                                                                                                                               | History of/on antidepressant medication; Yes/No                                                                                                                                  |
| Hearing Impairment                                                                                                                                                                                                                                                                | Yes/No                                                                                                                                                                           |
| Vision Impairment                                                                                                                                                                                                                                                                 | Yes/No                                                                                                                                                                           |
| Smoking Status                                                                                                                                                                                                                                                                    | Yes/No/Previous Smoker                                                                                                                                                           |
| Family History                                                                                                                                                                                                                                                                    | Memory Difficulties/Dementia/Alzheimer's Disease/ in a 1 <sup>st</sup> degree relative; Yes/No                                                                                   |
| Regular Medications                                                                                                                                                                                                                                                               | Medications List; Coded Using Anatomic Therapeutic Classification (ATC) system                                                                                                   |
| Anosmia                                                                                                                                                                                                                                                                           | Yes/No                                                                                                                                                                           |
| <b>Cognitive Symptoms at Presentation</b>                                                                                                                                                                                                                                         |                                                                                                                                                                                  |
| Symptom Duration                                                                                                                                                                                                                                                                  | Duration of Symptoms; in Months                                                                                                                                                  |
| Episodic Memory <ul style="list-style-type: none"> <li>• Lose Track of Days</li> <li>• Forgetting Appointments</li> <li>• Misplacing Objects</li> <li>• Forgetting to Pay Bills</li> <li>• Forgetting How to Use Appliances</li> <li>• Remembering to Take Medications</li> </ul> | Each Item Recorded as Yes/No Indicating Recent Change at Time of Assessment                                                                                                      |
| Autobiographical Memory <ul style="list-style-type: none"> <li>• Forgetting Past Personal Events</li> </ul>                                                                                                                                                                       | Recorded as Yes/No Indicating Recent Change at Time of Assessment                                                                                                                |
| Language <ul style="list-style-type: none"> <li>• Word-Finding Difficulties</li> <li>• Shrinkage of Vocabulary</li> <li>• Comprehending Speech</li> <li>• Comprehending Written Information</li> <li>• Ability to Engage in Conversations</li> </ul>                              | Each Item Recorded as Yes/No Indicating Recent Change at Time of Assessment                                                                                                      |
| Recognition <ul style="list-style-type: none"> <li>• Facial Recognition</li> <li>• Getting Lost in Familiar Areas</li> <li>• Changes in Using Public Transport/Driving</li> </ul>                                                                                                 | Each Item Recorded as Yes/No Indicating Recent Change at Time of Assessment                                                                                                      |
| Informant Concerns <ul style="list-style-type: none"> <li>• Issues with Cooking</li> <li>• Issues with Orientation</li> <li>• Issues with Driving</li> <li>• Issues with Medication Compliance</li> <li>• Recent Falls</li> </ul>                                                 | Each Item Recorded as Yes/No Indicating Recent Change at Time of Assessment                                                                                                      |
| <b>Cognitive Assessment</b>                                                                                                                                                                                                                                                       |                                                                                                                                                                                  |
| RBANS: <ul style="list-style-type: none"> <li>• Index I (Immediate Memory)</li> <li>• Index II (Visuospatial/Constructional)</li> <li>• Index III (Language)</li> <li>• Index IV (Attention)</li> <li>• Index V (Delayed Memory)</li> <li>• Global Score</li> </ul>               | Repeatable Battery for Assessment of Neuropsychological Status (RBANS) Unadjusted (Raw) Score and Centile Score Computed (Based on Age/Education) Normalisation using Duff Norms |
| ACE-III <ul style="list-style-type: none"> <li>• Attention</li> <li>• Memory</li> <li>• Fluency</li> <li>• Language</li> </ul>                                                                                                                                                    | Addenbrooke's Cognitive Assessment (ACE-III) if Unable to Complete RBANS Domain and Total Scores Recorded                                                                        |

|                                                                                                                                                                                                                                                               |                                                                                                                                                                                                                                                                                                                                                                                                                                                                                                                                                                                                                                                                                                     |
|---------------------------------------------------------------------------------------------------------------------------------------------------------------------------------------------------------------------------------------------------------------|-----------------------------------------------------------------------------------------------------------------------------------------------------------------------------------------------------------------------------------------------------------------------------------------------------------------------------------------------------------------------------------------------------------------------------------------------------------------------------------------------------------------------------------------------------------------------------------------------------------------------------------------------------------------------------------------------------|
| <ul style="list-style-type: none"> <li>• Visuospatial</li> <li>• Overall Score</li> </ul>                                                                                                                                                                     |                                                                                                                                                                                                                                                                                                                                                                                                                                                                                                                                                                                                                                                                                                     |
| CDR <ul style="list-style-type: none"> <li>• Memory</li> <li>• Orientation</li> <li>• Judgement &amp; Problem Solving</li> <li>• Community Affairs</li> <li>• Home and Hobbies</li> <li>• Personal Care</li> </ul>                                            | Clinical Dementia Rating Scale<br>Global Score and Sum of Boxes Recorded                                                                                                                                                                                                                                                                                                                                                                                                                                                                                                                                                                                                                            |
| FAB                                                                                                                                                                                                                                                           | Frontal Assessment Battery<br>Total Score Recorded                                                                                                                                                                                                                                                                                                                                                                                                                                                                                                                                                                                                                                                  |
| AD8 Administered to Informant                                                                                                                                                                                                                                 | Ascertain-Dementia 8 Questionnaire (Scored from 8)                                                                                                                                                                                                                                                                                                                                                                                                                                                                                                                                                                                                                                                  |
| CBI-R                                                                                                                                                                                                                                                         | Cambridge Behavioural Inventory Revised (CBI-R)                                                                                                                                                                                                                                                                                                                                                                                                                                                                                                                                                                                                                                                     |
| <b>Mood &amp; Anxiety Assessment</b>                                                                                                                                                                                                                          |                                                                                                                                                                                                                                                                                                                                                                                                                                                                                                                                                                                                                                                                                                     |
| HADS-Depression<br>HADS-Anxiety                                                                                                                                                                                                                               | Hospital Anxiety and Depression Scales<br>Total Score Recorded<br>Probable Depression/Anxiety (Score >10) Recorded                                                                                                                                                                                                                                                                                                                                                                                                                                                                                                                                                                                  |
| <b>Further Clinical Assessment</b>                                                                                                                                                                                                                            |                                                                                                                                                                                                                                                                                                                                                                                                                                                                                                                                                                                                                                                                                                     |
| PSQI                                                                                                                                                                                                                                                          | Pittsburgh Sleep Quality Index (0-21)                                                                                                                                                                                                                                                                                                                                                                                                                                                                                                                                                                                                                                                               |
| TUG                                                                                                                                                                                                                                                           | Timed-Up-And-Go Test; Time to Complete in seconds recorded                                                                                                                                                                                                                                                                                                                                                                                                                                                                                                                                                                                                                                          |
| CFS                                                                                                                                                                                                                                                           | Clinical Frailty Scale (CFS) to Assess Frailty                                                                                                                                                                                                                                                                                                                                                                                                                                                                                                                                                                                                                                                      |
| MNA                                                                                                                                                                                                                                                           | Mini Nutritional Assessment Score (0-7: Malnourished; 8-11: At Risk; 12-14: Normal)                                                                                                                                                                                                                                                                                                                                                                                                                                                                                                                                                                                                                 |
| <b>Neuroimaging</b>                                                                                                                                                                                                                                           |                                                                                                                                                                                                                                                                                                                                                                                                                                                                                                                                                                                                                                                                                                     |
| MRI Brain <ul style="list-style-type: none"> <li>• Fazekas Score</li> <li>• MTA Score</li> <li>• Koedam Score</li> </ul>                                                                                                                                      | Adjudicated at MDT Consensus Meeting by a panel of >2 geriatricians/neurologists <ul style="list-style-type: none"> <li>• Fazekas Score 0-3 for White Matter Disease</li> <li>• Medial Temporal Atrophy (MTA) score 0-4</li> <li>• Koedam Score for Parietal Atrophy score 0-3</li> </ul>                                                                                                                                                                                                                                                                                                                                                                                                           |
| CT Brain Results                                                                                                                                                                                                                                              | CT Brain results if performed; free text                                                                                                                                                                                                                                                                                                                                                                                                                                                                                                                                                                                                                                                            |
| FDG-PET Results                                                                                                                                                                                                                                               | FDG-PET results if performed; free text                                                                                                                                                                                                                                                                                                                                                                                                                                                                                                                                                                                                                                                             |
| DAT Results                                                                                                                                                                                                                                                   | DAT scan results if performed; free text                                                                                                                                                                                                                                                                                                                                                                                                                                                                                                                                                                                                                                                            |
| <b>Blood Test Results</b>                                                                                                                                                                                                                                     |                                                                                                                                                                                                                                                                                                                                                                                                                                                                                                                                                                                                                                                                                                     |
| Haematology Results <ul style="list-style-type: none"> <li>• Full Blood Count (FBC)</li> </ul>                                                                                                                                                                | Any abnormalities detected; yes/no; recorded in standard units as per hospital laboratory                                                                                                                                                                                                                                                                                                                                                                                                                                                                                                                                                                                                           |
| Biochemistry & Other Results <ul style="list-style-type: none"> <li>• Renal Profile</li> <li>• Liver Profile</li> <li>• Bone Profile</li> <li>• HbA1c</li> <li>• Lipid Profile</li> <li>• Micronutrients: Vitamin B12, Folate</li> <li>• Vitamin D</li> </ul> | Any abnormalities detected; yes/no; recorded in standard units as per hospital laboratory                                                                                                                                                                                                                                                                                                                                                                                                                                                                                                                                                                                                           |
| <b>Cerebrospinal Fluid Results</b>                                                                                                                                                                                                                            |                                                                                                                                                                                                                                                                                                                                                                                                                                                                                                                                                                                                                                                                                                     |
| Diagnostic Lumbar Puncture Results <ul style="list-style-type: none"> <li>• A<math>\beta</math><sub>1-42</sub></li> <li>• T-Tau</li> <li>• P-Tau</li> </ul>                                                                                                   | All recorded as pg/mL using Roche Elecsys Electrochemiluminescence Assay                                                                                                                                                                                                                                                                                                                                                                                                                                                                                                                                                                                                                            |
| <b>Working (Consensus Meeting) Diagnosis</b>                                                                                                                                                                                                                  |                                                                                                                                                                                                                                                                                                                                                                                                                                                                                                                                                                                                                                                                                                     |
| Working Diagnosis at Weekly MDT Meeting                                                                                                                                                                                                                       | Free Text                                                                                                                                                                                                                                                                                                                                                                                                                                                                                                                                                                                                                                                                                           |
| <b>Final (Biobank) Diagnosis</b>                                                                                                                                                                                                                              |                                                                                                                                                                                                                                                                                                                                                                                                                                                                                                                                                                                                                                                                                                     |
| Final Diagnosis Adjudicated Following all Investigations                                                                                                                                                                                                      | Functional Status: <ul style="list-style-type: none"> <li>• Subjective Memory Complaints</li> <li>• Mild Cognitive Impairment</li> <li>• Dementia</li> </ul> Aetiological Diagnosis: <ul style="list-style-type: none"> <li>• Alzheimer's Disease (amnestic, behavioural, LPA, CBS, and PCA variants)</li> <li>• Lewy Body Disease</li> <li>• Frontotemporal Dementia (FTD) (bvFTD/ nfvPPA/ svPPA)</li> <li>• FTD overlap syndromes: FTD-ALS/FTD-CBS/FTD-PSP</li> <li>• Cortico-basal Syndrome: 4R Tauopathy</li> <li>• Progressive Supranuclear Palsy</li> <li>• Vascular Cognitive Impairment/Dementia</li> <li>• Other Diagnosis [Free Text]</li> <li>• Genetic Diagnosis [Free Text]</li> </ul> |

LPA: Logopenic variant aphasia, CBS: corticobasal syndrome, PCA: Posterior cortical atrophy; bvFTD: behavioural variant FTD; nfvPPA: non fluent agrammatic PPA, svFTD: semantic variant FTD; 4R Tau: 4 repeat tauopathy; PPA: primary progressive aphasia

1  
2  
3  
4  
5 All participants undergo comprehensive clinical history, a multi-domain cognitive assessment and a  
6 collateral history is obtained for all participants which specifically examines driving safety, medication  
7 compliance in addition to classifying duration and domains of cognitive change. Cognitive symptoms  
8 are assessed by recent changes in the following domains: (i) episodic memory, (ii) autobiographical  
9 memory (iii) language and (iv) facial recognition/topographical memory. All of these variables are  
10 recorded as yes/no to indicate a recent change. Total duration of symptoms (in months) and first  
11 predominant symptom is also recorded.  
12  
13  
14  
15  
16  
17  
18  
19

20 Neuropsychological assessment consists of the Addenbrooke's Cognitive Examination (ACE-III) (28)  
21 and Frontal Assessment Battery (FAB) (29) – these items are completed in all participants  
22 Additionally the Repeatable Battery for the Assessment of Neuropsychological Status (RBANS) is  
23 performed if possible (30). The Clinical Dementia Rating Scale (CDR) global/sum of boxes is used to  
24 assess for dementia severity (31). The Ascertain Dementia 8 (AD8) questionnaire is also routinely  
25 administered to informants (32). The Cambridge Behavioural Inventory (CBI) captures recent  
26 behavioural changes and cognitive changes and affective symptoms are reported (33).  
27  
28  
29  
30  
31  
32  
33  
34  
35

36 Mood and Anxiety are routinely assessed via the Hospital Anxiety and Depression Scale (HADS)  
37 Anxiety and Depression scales (34). Sleep is assessed via the Pittsburgh Sleep Quality Index (PSQI)  
38 (35). Mobility is assessed by the Timed-Up-And-Go (TUG) test (36). Frailty is assessed via the  
39 Clinical Frailty Scale (CFS) (37) . Nutrition is assessed in all participants using the Mini-Nutritional  
40 Assessment (MNA) (38). The results of all these assessments are recorded in the TIMC-BRAIN Case  
41 Report Form.  
42  
43  
44  
45  
46  
47  
48

## 49 **Neuroimaging**

50  
51  
52

53 All individuals assessed in the TIMC have an MRI Brain performed, unless contra-indicated. MRI  
54 scans are reviewed at weekly consensus meeting and the following scores applied:  
55  
56  
57

- 58 (i) **Fazekas Score:** grades white matter disease, scored from 0-3 (39)  
59  
60

- 1  
2  
3 (ii) **Medial Temporal Lobe Atrophy (MTL):** grades mesio-temporal atrophy, scored  
4 from 0-4 (40)  
5  
6  
7 (iii) **Parietal Atrophy Score (Koedam Score):** grades parietal atrophy, scored from 0-3  
8  
9 (41)  
10  
11

12 Scores are applied by a panel of at least two consultants in geriatric medicine and neurology. These  
13 scores are recorded in TIMC-BRAiN data repository. Some individuals proceed to having additional  
14 imaging e.g. fluorodeoxyglucose (FDG)-PET or Dopamine Uptake (DaTScan) scans. The outcome of  
15 all relevant imaging is documented within the data repository (See Table 1).  
16  
17  
18  
19  
20  
21

### 22 **Diagnostic Workflow in TIMC-MASS & Final TIMC-BRAIN Diagnosis**

23  
24  
25

26 All cases, after completion of their clinical, neuropsychological and neuroimaging assessments, are  
27 discussed at a weekly consensus diagnostic meeting. This meeting, led by a consultant  
28 geriatrician/neurologist with expertise in neurodegenerative diseases, determines, where possible, a  
29 working (consensus) diagnosis. Further investigations such as advanced neuroimaging or diagnostic  
30 CSF sampling are recommended in appropriate cases.  
31  
32  
33  
34  
35  
36  
37

38 For individuals recruited into TIMC-BRAIN a separate biobank diagnostic meeting occurs on a bi-  
39 monthly basis. This meeting is convened by the biobank co-ordinator and attended by the biobank co-  
40 ordinator, data manager, research fellows, consultant geriatrician, consultant neurologist and study  
41 sub-investigators. Each case is discussed only after all appropriate clinical  
42 investigations/assessments have taken place and a final “biobank” diagnosis is confirmed reflecting (i)  
43 functional status and (ii) aetiological diagnosis as follows:  
44  
45  
46  
47  
48  
49  
50

#### 51 *Functional status :*

52  
53  
54

- 55 • Subjective Memory Complaints (SMCs): individuals with concerns over cognition/memory  
56 symptoms, free from established cognitive impairment on neuropsychological testing  
57  
58  
59  
60

- Mild Cognitive Impairment (MCI): impairments on 1 or more neuropsychological domain [typically 1.5 standard deviation from age/education mean], which do not interfere with day-to-day function. (20)
- Dementia: objective cognitive loss of any domain which is severe enough to cause functional decline in day-to-day activities.

#### *Aetiological Diagnosis:*

Published consensus criteria are used to classify aetiology as:

- AD (subtyped into amnesic, behavioural, logopenic variant aphasia, corticobasal syndrome, and posterior cortical atrophy variants) (5, 42, 43)
- Lewy Body Disease (44)
- Frontotemporal Dementia (FTD) subtyped into behavioural variant FTD (bvFTD), semantic variant FTD (svFTD), non-fluent agrammatic FTD (nfvFTD) (45) (46). Also, where applicable, include overlap syndromes: FTD-Corticobasal Syndrome (CBS); FTD-PSP (Progressive Supranuclear Palsy); FTD-ALS (Amyotrophic Lateral Sclerosis)
- Corticobasal Syndrome (CBS) – 4R tauopathy (47, 48)
- Progressive Supranuclear Palsy (PSP) (49)
- Vascular Cognitive impairment/Dementia (50)
- Other Diagnosis: This includes individuals with a diagnosis which does not conform to one of the above categories. Details around potential diagnoses will be recorded as free-text by the biobank manager.
- Genetic diagnosis. For the subset of participants with a genetic diagnosis this will also be reordered.

In cases where participants meet criteria for two aetiological diagnosis, e.g. nfvPPA and FTD-PSP, both aetiological diagnoses will be recorded as the final TIMC-BRAIN diagnosis. The biobank coordinator is responsible for recording the final biobank diagnosis on the appropriate participants RedCAP diagnostic section (see below under “Data Storage”).

#### **Blood and Cerebrospinal Fluid Sampling**

1  
2  
3  
4  
5 Following informed consent, blood sampling will be performed as part of routine phlebotomy if  
6 possible but in certain cases, may need to be performed separately. All blood tests will be obtained  
7 between 08:00-12:00 to minimise the risk of diurnal variation on biomarkers and processed on-site at  
8 TIMC within 2 hours of blood draw. For TIMC-BRAIN participants, a serum clot activator tube (9mL),  
9 two EDTA tubes (9mL each) and a Lithium Heparin (3mL) coated tube are collected. Fasting status  
10 will be recorded – however, participants are not asked to fast for the purposes of TIMC-BRAiN  
11 participation.  
12  
13  
14  
15  
16  
17  
18  
19

20 Individuals undergoing diagnostic CSF examination as part of their clinical assessment will be offered  
21 the opportunity to donate CSF samples to the TIMC-BRAiN biobank by a study investigator/sub-  
22 investigator. LPs are performed between 09:00-12:00 and are carried out in standard aseptic fashion.  
23 LPs are performed at the L3-L5 level and manometers are avoided. The maximum number of  
24 attempts (including change of operator where required) is 3. Diagnostic samples are obtained in the  
25 first instance, followed by an additional 5-10mL of CSF in 2.5mL sterile polypropylene tubes (Starstedt  
26 Ltd. Cat no 63.614.625) for donation to the TIMC-BRAIN biobank. CSF is collected by the drip method  
27 (gravity drip) as standard. Samples are inverted 3 times and processed on site within 30 minutes of  
28 collection.  
29  
30  
31  
32  
33  
34  
35  
36  
37  
38  
39

#### 40 **Sample Processing for TIMC-BRAIN**

41  
42  
43 See Figure 2 for blood and CSF sample processing protocol. Blood and CSF samples are processed  
44 on site at TIMC as soon as possible after collection. 0.5mL of whole blood is pipetted from one of the  
45 EDTA tubes and stored in a sterile polypropylene cryovial for later DNA analysis. 1mL of blood is  
46 removed from the Lithium Heparin tube and stored in 2 x 0.5mL aliquots with 0.5mL of Cytodelics™  
47 whole blood stabiliser for potential immune cell analysis by flow cytometry (51). Following this, the  
48 remaining blood samples (2 x EDTA tubes, 1 x Serum Clot Activator tubes) are centrifuged at 1.8 x g  
49 for 10 minutes. Plasma and Serum are subsequently aliquoted in 0.5mL sterile cryovials, labelled with  
50 anonymous TIMC-BRAiN participant ID and stored alongside whole blood and Cytodelics™ aliquots  
51 at -80°C for future analysis.  
52  
53  
54  
55  
56  
57  
58  
59  
60

1  
2  
3  
4  
5 < Insert Figure 2 >  
6  
7  
8

9 CSF samples are centrifuged at 400 x g for 10 minutes at 4°C to pellet immune cells. Cell-free CSF is  
10 subsequently aliquoted into 0.5mL sterile cryovials and stored at -80°C for future analysis. The  
11 remaining pellet is resuspended in 0.9mL Recovery Cell Culture Freezing Medium  
12 (ThermoScientific™) and stored overnight in a Mr Frosty™ Freezing Container at -80°C with aliquots  
13 removed and stored separately the following day for future use. This protocol is based on previously  
14 published reports examining immune cell composition (52, 53).  
15  
16  
17  
18  
19  
20  
21

## 22 **Data Storage**

23  
24  
25  
26 For each participant a unique anonymous TIMC-BRAiN ID will be generated which links  
27 clinical/neuroimaging data and biological samples. The clinical and cognitive data obtained will be  
28 recorded on a dedicated TIMC-BRAiN CRF once a final biobank diagnosis has been applied. A small  
29 subset of variables are also recorded for date of blood/CSF sampling and storage in the biobank on a  
30 study Sample Storage Form. The CRF is completed by a study investigator/sub-investigator following  
31 final biobank diagnosis and aims to capture all data obtained as part of routine clinical assessment as  
32 outlined above. Data will be stored using RedCAP (Research Electronic Data Capture), a web  
33 application for building and managing online surveys and databases for research studies. An  
34 institutional RedCAP system, protected by host and institutional firewalls, will be maintained at TUH  
35 by the TIMC-BRAIN study team. Only the Principal Investigator (PI), Study Investigators/Sub-  
36 Investigators and Biobank Manager will have complete access to the TIMC-BRAIN database on  
37 RedCAP. Biological samples which are coded matching the SSF on RedCAP are stored in dedicated  
38 freezer space in the Meath Foundation Laboratory, TUH. As part of the TIMC-BRAiN consent  
39 procedure, participants give permission for storage of data for an initial period of 5 years, which may  
40 be extended indefinitely according to review by the TIMC-BRAIN steering committee.  
41  
42  
43  
44  
45  
46  
47  
48  
49  
50  
51  
52  
53  
54  
55  
56  
57  
58  
59  
60



### **Longitudinal Data**

As part of routine care at TIMC participants diagnosed with MCI or dementia are routinely followed up in post-diagnostic support pathways. As part of this, all participants are regularly reviewed with routine repeat cognitive/neuropsychological assessment and dementia severity rating at 18-months. This data will be available for TIMC-BRAiN participants electing to have their clinical data stored in the TIMC-BRAiN repository. A follow-up CRF will document change in cognitive/neuropsychological test scores in addition to progression to dementia/progression of dementia severity.

### **Withdrawal Procedure**

If a participant wishes to withdraw from the study at any stage, this decision is clearly documented by the TIMC-BRAIN investigator/sub-investigator in the patient's medical notes and CRF. Participants clinical data will be fully removed from the RedCAP database including CRF and SSF. Biological samples donated will be identified by the biobank manager and destroyed. Participants will be informed that the decision to withdraw from TIMC-BRAiN will not affect their ongoing care.

### **Oversight**

The TIMC-BRAiN biobank is guided by a steering committee with a full meeting convened four times per year and reviews any requests for collaboration/sample use in addition to reviewing the day-to-day operating procedures of the biobank.

### **Data and Sample Access**

Applications for access to clinical data/neuroimaging data or biological samples from the TIMC-BRAIN biobank are considered by the Biobank committee and granted for specific reasons. Applications are reviewed once per quarter at the committee meeting and are reviewed, held pending further information/discussion or rejected based on study feasibility or quality, keeping in mind efficient use of the finite sample repository of TIMC-BRAIN and avoiding duplication of research effort. Following

1  
2  
3 request approval, samples and accompanying clinical/neuroimaging data are dispensed to the  
4 requesting study team via the Biobank Manager and recorded on the TIMC-BRAIN recruitment log.  
5  
6 For transfer of samples and data outside of the host institution (TUH), a Materials Transfer Agreement  
7 (MTA) will be generated, reviewed at the Biobank committee meeting and signed by both institutions.  
8  
9  
10

## 11 12 **Public and Patient Involvement**

13  
14  
15  
16 Despite the fact that the majority of older adults presenting to geriatric medicine services are  
17 interested in participating in research (54), older adults are typically under-represented in cohort  
18 studies and clinical trials, with many imposing arbitrary age-related or medical comorbidity-based cut-  
19 offs (55). To ensure the relevance, acceptability and feasibility of the TIMC-BRAiN biobank, feedback  
20 on the protocol design was obtained from patient representatives undergoing diagnostic work-up in  
21 the TIMC MASS. Additionally, a patient representative sits on the TIMC-BRAiN steering committee  
22 which discusses the ongoing use of research samples, questions to be addressed and day-to-day  
23 running of the biobank.  
24  
25  
26  
27  
28  
29  
30  
31  
32  
33

## 34 **Discussion**

35  
36  
37 Over a five-year period, the TIMC-BRAiN biobank will aim to create a large clinical data and biological  
38 sample repository to facilitate basic research aimed at understanding the underlying pathobiology of  
39 dementia, the discovery and validation of novel diagnostic and prognostic markers and facilitate  
40 research aimed at elucidating potential new treatment options for individuals living with  
41 neurodegenerative disease. By creating a central data repository of anonymized clinical data and  
42 biological samples, TIMC-BRAiN will enable suitable research questions to be addressed by  
43 accessing a ready and comprehensively phenotyped repository. The availability of such a repository  
44 will facilitate novel research questions into the underlying aetiology, diagnosis and treatment of  
45 neurodegenerative disease and speed-up collaborative research efforts for those living with  
46 neurodegenerative disease.  
47  
48  
49  
50  
51  
52  
53  
54  
55  
56  
57  
58  
59  
60

1  
2  
3 TIMC-BRAiN will recruit 1,000 individuals over five years and obtain comprehensive clinical data and  
4 biological samples that will be stored in a secure biobank offering a bioresource for future studies. On  
5  
6 of the key strengths of TIMC-BRAiN is the comprehensive neuropsychological data recorded, the  
7  
8 extensive data capture at time of routine clinical assessment paired with biological sampling (including  
9  
10 blood and CSF) all conducted in a routine memory assessment and support service – offering a  
11  
12 repository of real-world patient samples and data for future studies. This is crucial in the validation of  
13  
14 new biomarkers and diagnostics tests as well as the potential evaluation of new hypothesis around  
15  
16 the underlying pathobiology of memory disorders and dementia in older adults. TIMC-BRAiN is also  
17  
18 notable for its incorporation alongside clinical care as routine, where follow-up is currently conducted  
19  
20 as routine every 18-months for clinical progression, including progression to established cognitive  
21  
22 impairment/dementia in those with early cognitive symptoms and disease severity progression in  
23  
24 those with established dementia. Whilst TIMC-BRAiN is a single-site study, the Memory Assessment  
25  
26 and Support Service (MASS) at Tallaght University Hospital (TUH) accepts national referrals and is  
27  
28 the largest MASS in the Republic of Ireland. TIMC-BRAiN is the first biobank embedded within a  
29  
30 MASS in the Republic of Ireland.  
31  
32  
33

34 With the advent of new CSF and blood biomarkers in neurodegenerative disease, it is envisaged that  
35  
36 TIMC-BRAiN will offer an invaluable resource to research projects aimed at further validating these  
37  
38 markers across different populations, and at different stages of the disease process. Crucial to this is  
39  
40 the real-world nature of the TIMC-BRAiN cohort, comprised of individuals undergoing diagnostic work-  
41  
42 up for early cognitive symptoms or memory complaints. This is crucial to understand the real-world  
43  
44 utility of novel biomarkers for neurodegenerative disease as they emerge. Additionally, by providing  
45  
46 basic biomedical researchers with access to anonymized patient blood and CSF samples to readily  
47  
48 use, TIMC-BRAiN aims to act as a catalyst in facilitating new insights into the pathobiology of  
49  
50 neurodegenerative diseases.  
51  
52

### 53 **Ethics and Dissemination**

54  
55  
56

57 Ethical Approval has been granted by the St James's Hospital (SJH)/Tallaght University  
58  
59 Hospital(TUH) Joint Research Ethics Committee (JREC) which operates in compliance with the  
60

1  
2  
3 European Communities (Clinical Trials on Medicinal Products for Human Use) Regulations 2004 and  
4 ICH Good Clinical Practice Guidelines (Project ID: 2159). Written informed consent will be obtained  
5 from all individuals donating clinical/biological samples to TIMC-BRAiN. A data protection impact  
6 assessment and review was performed as part of this application at TUH and TIMC-BRAIN is fully  
7 compliant with General Data Protection Regulations (GDPR).  
8  
9  
10  
11  
12  
13

14 For dissemination of research findings, this will be conducted in several ways. In the first instance,  
15 results will be presented at relevant national/international conferences in the areas of geriatric  
16 medicine, neurology and memory disorders/dementia. Further, data from studies using data or  
17 samples from TIMC-BRAiN will be presented locally and within the host institution. All collaborators  
18 who make a meaningful contribution to recruitment, assessment, data curation and management of  
19 TIMC-BRAiN will be included on published outputs. Results from studies conducted using the TIMC-  
20 BRAiN Biobank will also form part of peer-reviewed journal publications and in doing so it is a key  
21 priority for the TIMC-BRAIN Biobank that all papers arising from the biobank are published in an  
22 open-access fashion.  
23  
24  
25  
26  
27  
28  
29  
30  
31  
32  
33

### 34 **Acknowledgements**

35 The authors wish to acknowledge support from the TIMC-MASS clinical and administrative staff.  
36  
37  
38  
39

### 40 **Author's Contributions**

41 AHD, HD and SPK are responsible for overall design, administration and conduct of the TIMC-BRAiN  
42 biobank. AHD and HD jointly wrote the manuscript. AOC, LM, GS, AM, EK, CGal, ND, EC, SL, CY,  
43 CGaf RE, CM, JJ, GK, Eke, AF, SOD designed clinical protocols for assessment of participants. AHD,  
44 HD, COF, NMB, SPK designed the laboratory protocols. All authors have read and approved the final  
45 manuscript. All authors were involved in informing the aims and design of the study.  
46  
47  
48  
49  
50  
51  
52

### 53 **Funding**

54 The TIMC-BRAiN Biobank, AHD, HD and SPK are funded by the Meath Foundation, Tallaght  
55 University Hospital. AHD has been awarded the Irish Clinical Academic Training (ICAT) Programme,  
56 supported by the Wellcome Trust and the Health Research Board (Grant Number 203930/B/16/Z), the  
57  
58  
59  
60

1  
2  
3 Health Service Executive, National Doctors Training and Planning and the Health and Social Care,  
4  
5 Research and Development Division, Northern Ireland.  
6  
7

### 8 **Competing Interests Statement**

9  
10 None Declared  
11  
12

### 13 **Patient Consent for Publication**

14  
15 Not Required  
16  
17

### 18 **Figure Legends**

19  
20 **Figure 1. Recruitment Workflow for the Tallaght Institute of Memory and Cognition Biobank for**  
21 **Research in Ageing and Neurodegeneration.** Individuals are referred to the TIMC-Memory  
22 Assessment and Support Service (MASS) for concerns over cognition or memory symptoms and are  
23 first assessed by an Advanced Nurse Practitioner (ANP) in memory. For TIMC-BRAiN, participants  
24 undergoing assessment will be provided with a Patient Information Leaflet (PIL) to consider donating  
25 clinical and/or biological samples to the TIMC-BRAiN biobank study. Should individuals wish to  
26 participate, they will undergo informed consent and may donate biological samples at time of  
27 diagnostic lumbar puncture or alongside routine phlebotomy. Participants are followed-up at 18-  
28 months to examine for conversion to examine for clinical progression. TIMC-MASS: Tallaght Institute  
29 of Memory and Cognition Memory Assessment and Support Service; ANP: Advanced Nurse  
30 Practitioner; PIL: Patient Information Leaflet.  
31  
32  
33  
34  
35  
36  
37  
38  
39  
40  
41  
42  
43  
44

45 **Figure 2. Biological Sample Processing for the Tallaght Institute of Memory and Cognition**  
46 **Biobank for Research in Ageing and Neurodegeneration.** Biological samples are obtained either  
47 alongside routine phlebotomy (for blood samples) or at time of diagnostic lumbar puncture (for  
48 cerebrospinal fluid where performed). EDTA: Ethylene-diamine-tetra-acetic acid; SCA: Serum Clot  
49 Activator; LiHep: Lithium Heparin; DNA: CSF: Cerebrospinal fluid.  
50  
51  
52  
53  
54  
55  
56  
57  
58  
59  
60

## References

1. Livingston G, Huntley J, Sommerlad A, Ames D, Ballard C, Banerjee S, et al. Dementia prevention, intervention, and care: 2020 report of the Lancet Commission. *Lancet*. 2020;396(10248):413-46.
2. Satizabal CL, Beiser AS, Chouraki V, Chêne G, Dufouil C, Seshadri S. Incidence of Dementia over Three Decades in the Framingham Heart Study. *N Engl J Med*. 2016;374(6):523-32.
3. Hampel H, Gao P, Cummings J, Toschi N, Thompson PM, Hu Y, et al. The foundation and architecture of precision medicine in neurology and psychiatry. *Trends Neurosci*. 2023.
4. Hampel H, Shaw LM, Aisen P, Chen C, Lleó A, Iwatsubo T, et al. State-of-the-art of lumbar puncture and its place in the journey of patients with Alzheimer's disease. *Alzheimers Dement*. 2022;18(1):159-77.
5. Dubois B, Villain N, Frisoni GB, Rabinovici GD, Sabbagh M, Cappa S, et al. Clinical diagnosis of Alzheimer's disease: recommendations of the International Working Group. *Lancet Neurol*. 2021;20(6):484-96.
6. Briggs R, McHale C, Fitzhenry D, O'Neill D, Kennelly SP. Dementia, disclosing the diagnosis. *Qjm*. 2018;111(4):215-6.
7. Dubois B, Padovani A, Scheltens P, Rossi A, Dell'Agnello G. Timely Diagnosis for Alzheimer's Disease: A Literature Review on Benefits and Challenges. *J Alzheimers Dis*. 2016;49(3):617-31.
8. Largent EA, Grill J, O'Brien K, Wolk D, Harkins K, Karlawish J. Testing for Alzheimer Disease Biomarkers and Disclosing Results Across the Disease Continuum. *Neurology*. 2023.
9. Duits FH, Martinez-Lage P, Paquet C, Engelborghs S, Lleó A, Hausner L, et al. Performance and complications of lumbar puncture in memory clinics: Results of the multicenter lumbar puncture feasibility study. *Alzheimers Dement*. 2016;12(2):154-63.
10. van Maurik IS, Broulikova HM, Mank A, Bakker ED, de Wilde A, Bouwman FH, et al. A more precise diagnosis by means of amyloid PET contributes to delayed institutionalization, lower mortality, and reduced care costs in a tertiary memory clinic setting. *Alzheimers Dement*. 2022.
11. de Wilde A, van der Flier WM, Pelkmans W, Bouwman F, Verwer J, Groot C, et al. Association of Amyloid Positron Emission Tomography With Changes in Diagnosis and Patient Treatment in an Unselected Memory Clinic Cohort: The ABIDE Project. *JAMA Neurol*. 2018;75(9):1062-70.
12. Horie K, Barthélemy NR, Spina S, VandeVrede L, He Y, Paterson RW, et al. CSF tau microtubule-binding region identifies pathological changes in primary tauopathies. *Nat Med*. 2022;28(12):2547-54.
13. Poggiolini I, Gupta V, Lawton M, Lee S, El-Turabi A, Querejeta-Coma A, et al. Diagnostic value of cerebrospinal fluid alpha-synuclein seed quantification in synucleinopathies. *Brain*. 2022;145(2):584-95.
14. Hansson O, Edelmayer RM, Boxer AL, Carrillo MC, Mielke MM, Rabinovici GD, et al. The Alzheimer's Association appropriate use recommendations for blood biomarkers in Alzheimer's disease. *Alzheimers Dement*. 2022;18(12):2669-86.
15. Mattsson N, Palmqvist S, Stomrud E, Vogel J, Hansson O. Staging  $\beta$ -Amyloid Pathology With Amyloid Positron Emission Tomography. *JAMA Neurol*. 2019;76(11):1319-29.
16. Janelidze S, Mattsson N, Palmqvist S, Smith R, Beach TG, Serrano GE, et al. Plasma P-tau181 in Alzheimer's disease: relationship to other biomarkers, differential diagnosis, neuropathology and longitudinal progression to Alzheimer's dementia. *Nat Med*. 2020;26(3):379-86.
17. Ashton NJ, Janelidze S, Mattsson-Carlsson N, Binette AP, Strandberg O, Brum WS, et al. Differential roles of A $\beta$ 42/40, p-tau231 and p-tau217 for Alzheimer's trial selection and disease monitoring. *Nat Med*. 2022;28(12):2555-62.
18. O'Connor A, Abel E, Benedet AL, Poole T, Ashton N, Weston PSJ, et al. Plasma GFAP in presymptomatic and symptomatic familial Alzheimer's disease: a longitudinal cohort study. *J Neurol Neurosurg Psychiatry*. 2023;94(1):90-2.
19. O'Connor A, Karikari TK, Poole T, Ashton NJ, Lantero Rodriguez J, Khatun A, et al. Plasma phospho-tau181 in presymptomatic and symptomatic familial Alzheimer's disease: a longitudinal cohort study. *Mol Psychiatry*. 2021;26(10):5967-76.
20. Dunne RA, Aarsland D, O'Brien JT, Ballard C, Banerjee S, Fox NC, et al. Mild cognitive impairment: the Manchester consensus. *Age Ageing*. 2021;50(1):72-80.

21. Ward A, Tardiff S, Dye C, Arrighi HM. Rate of conversion from prodromal Alzheimer's disease to Alzheimer's dementia: a systematic review of the literature. *Dement Geriatr Cogn Dis Extra*. 2013;3(1):320-32.
22. Hansson O, Seibyl J, Stomrud E, Zetterberg H, Trojanowski JQ, Bittner T, et al. CSF biomarkers of Alzheimer's disease concord with amyloid- $\beta$  PET and predict clinical progression: A study of fully automated immunoassays in BioFINDER and ADNI cohorts. *Alzheimers Dement*. 2018;14(11):1470-81.
23. Weiner MW, Veitch DP, Aisen PS, Beckett LA, Cairns NJ, Green RC, et al. The Alzheimer's Disease Neuroimaging Initiative: a review of papers published since its inception. *Alzheimers Dement*. 2013;9(5):e111-94.
24. Ashton NJ, Janelidze S, Al Khleifat A, Leuzy A, van der Ende EL, Karikari TK, et al. A multicentre validation study of the diagnostic value of plasma neurofilament light. *Nat Commun*. 2021;12(1):3400.
25. Leuzy A, Janelidze S, Mattsson-Carlgen N, Palmqvist S, Jacobs D, Cicognola C, et al. Comparing the Clinical Utility and Diagnostic Performance of CSF P-Tau181, P-Tau217, and P-Tau231 Assays. *Neurology*. 2021;97(17):e1681-e94.
26. Leuzy A, Smith R, Cullen NC, Strandberg O, Vogel JW, Binette AP, et al. Biomarker-Based Prediction of Longitudinal Tau Positron Emission Tomography in Alzheimer Disease. *JAMA Neurol*. 2022;79(2):149-58.
27. Pavlik VN, Burnham SC, Kass JS, Helmer C, Palmqvist S, Vassilaki M, et al. Connecting Cohorts to Diminish Alzheimer's Disease (CONCORD-AD): A Report of an International Research Collaboration Network. *J Alzheimers Dis*. 2022;85(1):31-45.
28. Bruno D, Schurmann Vignaga S. Addenbrooke's cognitive examination III in the diagnosis of dementia: a critical review. *Neuropsychiatr Dis Treat*. 2019;15:441-7.
29. Dubois B, Slachevsky A, Litvan I, Pillon B. The FAB: a Frontal Assessment Battery at bedside. *Neurology*. 2000;55(11):1621-6.
30. Randolph C, Tierney MC, Mohr E, Chase TN. The Repeatable Battery for the Assessment of Neuropsychological Status (RBANS): preliminary clinical validity. *J Clin Exp Neuropsychol*. 1998;20(3):310-9.
31. Morris JC. The Clinical Dementia Rating (CDR): current version and scoring rules. *Neurology*. 1993;43(11):2412-4.
32. Galvin JE, Roe CM, Powlishta KK, Coats MA, Muich SJ, Grant E, et al. The AD8: a brief informant interview to detect dementia. *Neurology*. 2005;65(4):559-64.
33. Wear HJ, Wedderburn CJ, Mioshi E, Williams-Gray CH, Mason SL, Barker RA, et al. The Cambridge Behavioural Inventory revised. *Dement Neuropsychol*. 2008;2(2):102-7.
34. Zigmond AS, Snaith RP. The hospital anxiety and depression scale. *Acta Psychiatr Scand*. 1983;67(6):361-70.
35. Buysse DJ, Reynolds CF, 3rd, Monk TH, Berman SR, Kupfer DJ. The Pittsburgh Sleep Quality Index: a new instrument for psychiatric practice and research. *Psychiatry Res*. 1989;28(2):193-213.
36. Bohannon RW. Reference values for the timed up and go test: a descriptive meta-analysis. *J Geriatr Phys Ther*. 2006;29(2):64-8.
37. Rockwood K, Song X, MacKnight C, Bergman H, Hogan DB, McDowell I, et al. A global clinical measure of fitness and frailty in elderly people. *Cmaj*. 2005;173(5):489-95.
38. Vellas B, Guigoz Y, Garry PJ, Nourhashemi F, Bennahum D, Lauque S, et al. The Mini Nutritional Assessment (MNA) and its use in grading the nutritional state of elderly patients. *Nutrition*. 1999;15(2):116-22.
39. Fazekas F, Barkhof F, Wahlund LO, Pantoni L, Erkinjuntti T, Scheltens P, et al. CT and MRI rating of white matter lesions. *Cerebrovasc Dis*. 2002;13 Suppl 2:31-6.
40. Duara R, Loewenstein DA, Potter E, Appel J, Greig MT, Urs R, et al. Medial temporal lobe atrophy on MRI scans and the diagnosis of Alzheimer disease. *Neurology*. 2008;71(24):1986-92.
41. Koedam EL, Lehmann M, van der Flier WM, Scheltens P, Pijnenburg YA, Fox N, et al. Visual assessment of posterior atrophy development of a MRI rating scale. *Eur Radiol*. 2011;21(12):2618-25.
42. Crutch SJ, Schott JM, Rabinovici GD, Murray M, Snowden JS, van der Flier WM, et al. Consensus classification of posterior cortical atrophy. *Alzheimers Dement*. 2017;13(8):870-84.
43. Ossenkoppele R, Singleton EH, Groot C, Dijkstra AA, Eikelboom WS, Seeley WW, et al. Research Criteria for the Behavioral Variant of Alzheimer Disease: A Systematic Review and Meta-analysis. *JAMA Neurol*. 2022;79(1):48-60.

- 1  
2  
3 44. McKeith IG, Boeve BF, Dickson DW, Halliday G, Taylor JP, Weintraub D, et al. Diagnosis and  
4 management of dementia with Lewy bodies: Fourth consensus report of the DLB Consortium.  
5 *Neurology*. 2017;89(1):88-100.
- 6 45. Rascovsky K, Hodges JR, Knopman D, Mendez MF, Kramer JH, Neuhaus J, et al. Sensitivity  
7 of revised diagnostic criteria for the behavioural variant of frontotemporal dementia. *Brain*.  
8 2011;134(Pt 9):2456-77.
- 9 46. Younes K, Borghesani V, Montembeault M, Spina S, Mandelli ML, Welch AE, et al. Right  
10 temporal degeneration and socioemotional semantics: semantic behavioural variant frontotemporal  
11 dementia. *Brain*. 2022;145(11):4080-96.
- 12 47. Armstrong MJ, Litvan I, Lang AE, Bak TH, Bhatia KP, Borroni B, et al. Criteria for the  
13 diagnosis of corticobasal degeneration. *Neurology*. 2013;80(5):496-503.
- 14 48. Street D, Jabbari E, Costantini A, Jones PS, Holland N, Rittman T, et al. Progression of  
15 atypical parkinsonian syndromes: PROSPECT-M-UK study implications for clinical trials. *Brain*. 2023.
- 16 49. Höglinger GU, Respondek G, Stamelou M, Kurz C, Josephs KA, Lang AE, et al. Clinical  
17 diagnosis of progressive supranuclear palsy: The movement disorder society criteria. *Mov Disord*.  
18 2017;32(6):853-64.
- 19 50. Sachdev P, Kalaria R, O'Brien J, Skoog I, Alladi S, Black SE, et al. Diagnostic criteria for  
20 vascular cognitive disorders: a VASCOG statement. *Alzheimer Dis Assoc Disord*. 2014;28(3):206-18.
- 21 51. Nguyen NA, Huang X, Cabrera LE, Pekkarinen PT, Nowlan K, Strandin T, et al. A  
22 comprehensive assessment of four whole blood stabilizers for flow-cytometric analysis of leukocyte  
23 populations. *Cytometry A*. 2022.
- 24 52. Oh H, Leventhal O, Channappa D, Henderson VW, Wyss-Coray T, Lehallier B, et al. Methods  
25 to investigate intrathecal adaptive immunity in neurodegeneration. *Mol Neurodegener*. 2021;16(1):3.
- 26 53. Piehl N, van Olst L, Ramakrishnan A, Teregulova V, Simonton B, Zhang Z, et al.  
27 Cerebrospinal fluid immune dysregulation during healthy brain aging and cognitive impairment. *Cell*.  
28 2022;185(26):5028-39.e13.
- 29 54. Davey N, Connolly E, McFeely A, Bambrick P, Pope G, Mulcahy R, et al. 286  
30 PERCEPTIONS OF RESEARCH AMONGST OLDER ADULTS. *Age and Ageing*.  
31 2022;51(Supplement\_3).
- 32 55. Goodwin VA, Low MSA, Quinn TJ, Cockcroft EJ, Shepherd V, Evans PH, et al. Including  
33 older people in health and social care research: best practice recommendations based on the  
34 INCLUDE framework. *Age and Ageing*. 2023;52(6).
- 35  
36  
37  
38  
39  
40  
41  
42  
43  
44  
45  
46  
47  
48  
49  
50  
51  
52  
53  
54  
55  
56  
57  
58  
59  
60



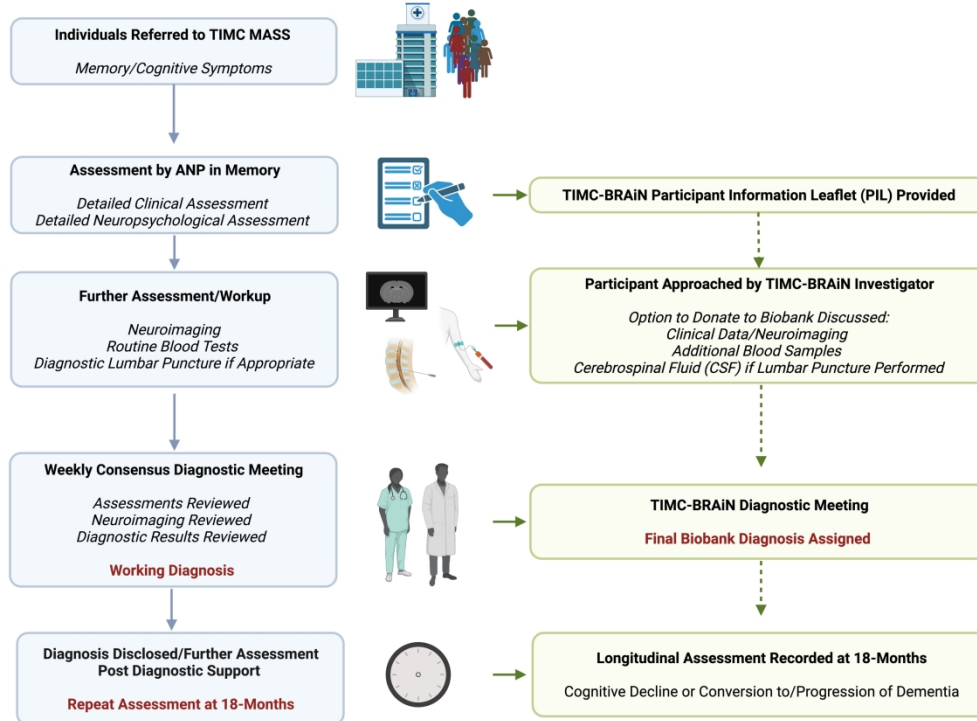

Recruitment Workflow for the Tallaght Institute of Memory and Cognition Biobank for Research in Ageing and Neurodegeneration. Individuals are referred to the TIMC-Memory Assessment and Support Service (MASS) for concerns over cognition or memory symptoms and are first assessed by an Advanced Nurse Practitioner (ANP) in memory. For TIMC-BRAiN, participants undergoing assessment will be provided with a Patient Information Leaflet (PIL) to consider donating clinical and/or biological samples to the TIMC-BRAiN biobank study. Should individuals wish to participate, they will undergo informed consent and may donate biological samples at time of diagnostic lumbar puncture or alongside routine phlebotomy. Participants are followed-up at 18-months to examine for conversion to examine for clinical progression. TIMC-MASS: Tallaght Institute of Memory and Cognition Memory Assessment and Support Service; ANP: Advanced Nurse Practitioner; PIL: Patient Information Leaflet.

237x174mm (300 x 300 DPI)

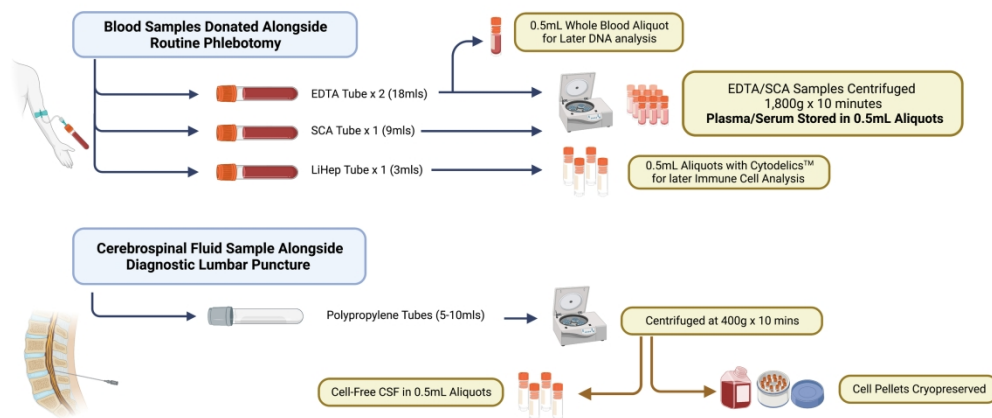

Figure 2. Biological Sample Processing for the Tallaght Institute of Memory and Cognition Biobank for Research in Ageing and Neurodegeneration. Biological samples are obtained either alongside routine phlebotomy (for blood samples) or at time of diagnostic lumbar puncture (for cerebrospinal fluid where performed). EDTA: Ethylene-diamine-tetra-acetic acid; SCA: Serum Clot Activator; LiHep: Lithium Heparin; DNA: CSF: Cerebrospinal fluid.

244x109mm (300 x 300 DPI)

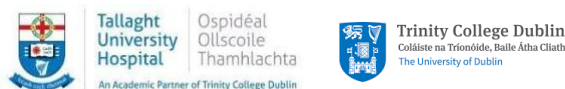

## **TIMC-BRAiN**

# **TUH Institute for Memory & Cognition – BioBank for Research in Ageing & Neurodegeneration**

### **Participant Information Leaflet (PIL)**

|                             |                                                                                                                                                                                            |
|-----------------------------|--------------------------------------------------------------------------------------------------------------------------------------------------------------------------------------------|
| Name of Biobank             | TIMC-BRAiN Biobank                                                                                                                                                                         |
| Location                    | Tallaght Institute of Memory and Cognition (TIMC), TUH                                                                                                                                     |
| Principal Investigator (PI) | Professor Sean Kennelly, TUH                                                                                                                                                               |
| Co-Investigators            | Dr Adam Dyer, TUH; Dr Helena Dolphin, TUH                                                                                                                                                  |
| Data Controller             | Department of Age-Related Healthcare, TUH                                                                                                                                                  |
| Contact                     | <a href="mailto:Sean.Kennelly@tuh.ie">Sean.Kennelly@tuh.ie</a> ; <a href="mailto:Adam.Dyer@tuh.ie">Adam.Dyer@tuh.ie</a> ; <a href="mailto:Helena.Dolphin@tuh.ie">Helena.Dolphin@tuh.ie</a> |
| Data Protection             | <a href="mailto:Sean.Kennelly@tuh.ie">Sean.Kennelly@tuh.ie</a> ; <a href="mailto:Adam.Dyer@tuh.ie">Adam.Dyer@tuh.ie</a> ; <a href="mailto:Helena.Dolphin@tuh.ie">Helena.Dolphin@tuh.ie</a> |

You are invited to take part in the **TIMC-BRAiN Biobank**. This research study collects **clinical data** (including memory assessments, medical conditions and medications) and **biological samples** (including blood and cerebrospinal fluid samples), donated by participants for health research. This study helps doctors and researchers to learn more about the diagnosis and treatment of memory problems (such as cognitive impairment and dementia). This helps us to better understand how and why people develop these conditions. **Please read this leaflet carefully. Your physician in the Institute of Memory and Cognition in TUH can answer any questions that you may have.**

### **Key Words**

| <b>When we say...</b>           | <b>We mean...</b>                                                                                                                                                                    |
|---------------------------------|--------------------------------------------------------------------------------------------------------------------------------------------------------------------------------------|
| Academic research               | Research carried out in hospitals, universities, colleges and research institutes                                                                                                    |
| Biobank                         | A collection of clinical data and biological samples donated by participants for health research                                                                                     |
| DNA                             | Your DNA (genes) make who you are by instructing cells to carry out specific tasks                                                                                                   |
| Genetic Research                | Research which examines peoples' genetic information (genes) to help understand how cognitive impairment and dementia develops and how best to treat it                              |
| Clinical Data                   | Information in your hospital chart, electronic patient record and other hospital databases including name, address, test results, images and scans.                                  |
| Identifiable data               | Information that might identify you such as name, address, date of birth                                                                                                             |
| Non-identifiable ("Coded") data | Information that might identify you has been removed and replaced by a unique code. This is used instead of name, address, date of birth                                             |
| Principal Investigator          | The person responsible for a biobank or specific research study                                                                                                                      |
| Research Ethics Committee       | Independent group of people who review each study to ensure that research is carried out ethically and safely and that rights are protected                                          |
| Research studies                | Research to learn more about cognitive impairment and dementia such as genetic research, how the condition changes or progresses, early detection and new diagnostics and treatments |

## PART 1 – THE STUDY

### Why is this study being done?

Our research aims to learn more about **why people develop memory problems (such as cognitive impairment and dementia)**. We aim to understand **how and why** certain people develop these conditions. This includes analysis of **clinical information**, blood samples as well as lifestyle factors and family history. Additionally, we are trying to **develop new tests and methods of diagnosing these conditions**. This type of research requires many people to donate samples and data. This study (TIMC-BRAiN) speeds up research by allowing the research team have samples and data ready to use when needed. **The aim of this is to improve the diagnosis, management and treatment of memory problems (cognitive impairment and dementia)**.

Your clinical data and biological samples will be stored **until researchers need them** in order to answer important questions. Your data and samples may thus be included in many different research studies and for this reason your data and samples may be stored indefinitely (forever). This biobank may share your **non-identifiable data** with other researchers working around the world. However, no potentially identifiable data will be shared outside of Tallaght University Hospital.

### What happens if I take part ?

If you would like to take part, please read this leaflet and sign the consent form at the end. You will be given a copy of this leaflet to keep. A member of the research team will discuss this with you in more detail. If you are happy to take part, the biobank will collect and store

- **Clinical information** from your medical records, including medication history and medication usage in addition to test results from your cognitive assessment (memory tests)
- **Blood samples:** if you are having a routine blood test, the research doctor may take extra samples of blood to give to the biobank This is a small sample – about 3 tablespoons of blood
- **Cerebrospinal fluid samples:** if you are having a lumbar puncture as part of your memory assessment and diagnosis, the research team may ask to take an extra sample to store in the biobank. **This will only take place if you are having a lumbar puncture performed as part of your clinical assessment. There are no lumbar punctures being carried out solely for research purposes.**
- **Genetic (DNA) Samples:** DNA samples will be extracted from blood and samples for research. DNA is the molecule that provides instructions for how cells in our body work. By looking at DNA from people with and without vasculitis we may see differences that are important for diagnosis, treatment or understanding the condition.

### What will happen to my clinical data and biological samples ?

All samples and data will be given a random study number in TUH by your study physician in a process called pseudo-anonymisation or “coding”. This is intended to mask your identity. All biological samples will be stored in the Meath Foundation laboratory in Tallaght University Hospital using this code. Additionally, your clinical data will be stored on secure databases using this code. Only the study investigators have access to this code and this code will not be shared outside of the study team.

Samples will be stored in a freezer and will remain frozen for decades and potentially indefinitely (forever) so that we can identify future diagnostics and treatment for cognitive impairment and dementia. Samples are being kept indefinitely as scientific research rapidly changes and advances all the time, and we do not yet know what kinds of research questions will arise in the future. The only individuals with direct access to your samples are the investigators of the TIMC-BRAiN study.

Data and samples may be shared with other collaborators. If this is the case, a “Materials Transfer Agreement” will be drawn up by the TIMC-BRAiN study co-ordinators and the collaborating institutions/research groups. This may include samples and data being transferred outside of the European Economic Area (EEA). These samples and data will have all identifying features removed.

### What are the benefits to me ?

Research can lead to better diagnostic tests, treatments and quality of life for people with cognitive impairment and dementia. The treatments that we have now developed are as a result of past research studies and biobanks. The TIMC biobank collects samples and healthcare data for future research and therefore we cannot predict at this time what research questions will arise in the future and what discoveries these will lead to. It takes many years to do research, so this research may not directly benefit you personally. **However, by participating you are contributing to improving the diagnosis, treatment and management of individuals living with cognitive impairment and dementia long into the future.**

### What are the risks of participation ? Will I be informed of my results ?

As with any medical records, there is a theoretical risk of accidental disclosure of healthcare data. However, this is very unlikely as every effort will be made to protect your privacy (see below Section B and Section C). A blood sample may cause bruising or slight discomfort. The additional sample taken at time of diagnostic lumbar puncture poses minimal extra risk (you may be very slightly more likely to experience a post lumbar-puncture headache, however this additional risk is very minimal).

**There are additional risks involved in genetic testing. Our genetic testing is entirely focused on the study of the genetics of cognitive impairment and dementia. Therefore it is possible**

1  
2  
3 that even if you take part in the study. Even if we do not discover a genetic cause for your  
4 condition now, one may still be discovered in the future. It is common that we discover no  
5 genetic association for cognitive impairment or dementia or that it takes many years in order  
6 to do so. No results will be communicated as a result of genetic testing in this study as this is  
7 entirely a research study aimed at discovering genes for cognitive impairment and dementia.

8  
9 Thus, we are not testing for any other genetic mutations of potential clinical significance.  
10  
11  
12

### 13 **Do I have to take part ?**

14  
15 **No, you do not have to take part. Your decision is completely voluntary and will not affect your**  
16 **medical care now or in the future.**  
17  
18

### 19 **What happens if I change my mind ?**

20  
21 You can change your mind at any time. If you contact the study team at any time to inform us that you  
22 no longer wish to participate, your samples will be **removed from the biobank and destroyed**.  
23 Additionally, the clinical data contributed as part of the biobanked will be removed from the biobank  
24 database. From that point on, none of your further samples of information will be used as part of the  
25 biobank. However, it may not be possible to destroy samples and healthcare data that have already  
26 been used for research as this could influence the results of the research.  
27  
28  
29  
30  
31

### 32 **What happens the results from research ?**

33  
34 Research is usually published in scientific and medical journals or presented at conferences so that  
35 other doctors and researchers can learn. You will not be identified in any of these publications or  
36 presentations. The research from TIMC-BRAiN will go on to inform the diagnosis, investigation and  
37 treatment of cognitive impairment and dementia into the future.  
38  
39  
40  
41

## 42 **PART 2 – BIOBANK MANAGEMENT**

### 43 **How does the TIMC-BRAiN Biobank protect my privacy ?**

44  
45 TIMC-BRAiN has very strict governance procedures in place. **Only the TIMC-BRAiN team** have  
46 access to clinical data and biological samples. Only research studies that have been approved by the  
47 SJH/TUH JREC Ethics Committee will use clinical data and biological samples. Prof Kennelly and the  
48 study team must sign **legal agreements before clinical data and biological samples can be**  
49 **shared**. This ensures that your samples are only used as agreed. All members of the research team  
50 will undergo **General Data Protection Regulation (GDPR)** training and are bound by hospital  
51 confidentiality rules. TIMC-BRAiN ensures that your data is stored in a de-identified “coded” manner  
52 on **secure servers and only accessible by members of the study team**.  
53  
54  
55  
56  
57  
58  
59  
60

### Has the biobank been approved by an ethics committee ?

Yes. This biobank has been approved by the SJH/TUH Joint Research Ethics Committee.

### How is this biobank funded ?

This biobank is funded by departmental funds from the **Tallaght Institute of Memory and Cognition, Department of Age-Related Healthcare, Tallaght University Hospital**. The biobank does not make a profit from collecting or sharing your samples and healthcare data for health research.

### Will I be paid for my involvement ?

No. You will not be paid to take part. It is hoped that your donation of samples and data will help other individuals undergoing investigation and treatment for cognitive impairment and dementia in the future.

## PART 3 – WHAT DOES THE BIOBANK DO WITH MY HEALTHCARE DATA ?

### Why does TIMC-BRAiN need to collect my clinical data ?

Clinical data is needed in order for researchers to choose the right biological samples for research or help interpret the results of their studies. To take part, you will be asked to share your clinical data collected as part of memory assessment and clinical workup with the TIMC-BRAiN biobank.

### What type of clinical data will be collected ?

The biobank will collect healthcare and clinical data from your hospital chart, electronic records and other hospital databases. This data will only be accessed by study investigators (listed above). The study investigators (Dr Dyer/Dolphin, Prof Kennelly) may know your identity to follow your care and treatment. However, your identifiable information will only be able to be accessed by study investigators. The TIMC-BRAiN biobank will store the following clinical data:

- Name, gender, date of birth, hospital number, laboratory identifiers; this information will be stored on a protected database **only accessible by the study investigators**
- Results of blood tests, medical history, regular medications, lifestyle information (smoking, alcohol use), neuroimaging results and final diagnosis and treatment. This information is all routinely obtained as part of work-up, assessment, diagnosis and treatment of cognitive impairment and dementia.
- Results of cerebrospinal fluid investigations, if applicable.

## How is my data stored and shared ?

When you are enrolled in the study, you will be assigned an anonymous study number. The “key” will be stored in TUH on a locked database only accessible to the study investigators. Clinical data and clinical results will be stored on a secure database maintained on servers in Tallaght University Hospital. This will be stored using the REDCap system (Research Electronic Data Capture) which is used globally for the storage of sensitive research data. This will only be accessible by study investigators.

### Your clinical data may be shared as:

- (i) **Identifiable Data:** the study investigators at the Tallaght Institute of Memory and Cognition may know your identity in order to follow your care and treatment. Only the above named investigators will have access to your identifiable data
- (ii) **Non-identifiable data:** researchers working as part of collaborations or research studies outside of the study team (either in Trinity College Dublin, academic partners of TUH, or as part of other researchers) receive “non-identifiable data”. This means that information that may identify you has been removed and replaced with a unique code which is used instead of your hospital number, date of birth, address. These researchers work in universities or hospital. Data sharing will only take place as outlined above and your data will not be shared with any external companies or for-profit organisations.

## What are my rights ?

TIMC-BRAiN has data protection measures in place and is committed to ensuring that your rights under GDPR (General Data Protection Regulation) are protected. The Department of Age-Related Healthcare is the data controller for this study. We also ask for your consent as a data protection safeguard, in accordance with the Irish Health Research Research Regulations 2018.

- Under the European General Data Protection Regulation (GDPR), the lawful basis for processing your data in this study is for scientific research (Article 9(2) (j)) in the public interest (Article 6(1)(e)).
- Under GDPR, you can exercise the following rights in relation to your personal data, unless the request would make it impossible or very difficult to conduct the research:
  - The right to access to your data and receive a copy of it
  - The right to restrict or object to processing of your data
  - The right to object to any further processing of the information we hold about you (except where it is de-identified)
  - The right to have inaccurate information about you corrected or deleted



- 1  
2  
3           ○ The right to receive your data in a portable format and to have it transferred to  
4           another data controller  
5  
6           ○ The right to request deletion of your data  
7  
8       • You can exercise these rights by contacting your study doctor/study investigator  
9       • Under GDPR, if you are not satisfied with how your data is being used, you have the right to  
10       lodge a complaint with the Data Protection Commissioner of Ireland or the study Data  
11       Protection Officer ([dpo@tuh.ie](mailto:dpo@tuh.ie))  
12  
13  
14  
15  
16  
17  
18  
19  
20  
21  
22  
23  
24  
25  
26  
27  
28  
29  
30  
31  
32  
33  
34  
35  
36  
37  
38  
39  
40  
41  
42  
43  
44  
45  
46  
47  
48  
49  
50  
51  
52  
53  
54  
55  
56  
57  
58  
59  
60

For peer review only

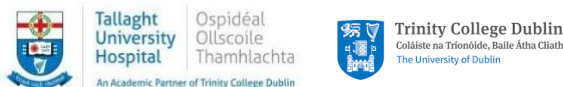

**TIMC-BRAiN**

**TUH Institute for Memory & Cognition – Biobank for Research in Ageing & Neurodegeneration**

**CONSENT FORM**

To be completed by the participant:

|                                                                                                                                                                                                                                                                                                           |                              |                             |
|-----------------------------------------------------------------------------------------------------------------------------------------------------------------------------------------------------------------------------------------------------------------------------------------------------------|------------------------------|-----------------------------|
| I have read and understood the information leaflet for the study. The information has been fully explained to me and I have been able to ask questions, all of which have been answered to my satisfaction                                                                                                | YES <input type="checkbox"/> | NO <input type="checkbox"/> |
| I have had the opportunity to discuss the study, ask questions about the study and I have received satisfactory answers to all my questions.                                                                                                                                                              | YES <input type="checkbox"/> | NO <input type="checkbox"/> |
| I understand that my participation is voluntary, and I can withdraw my biological material and data at any time without giving a reason. I understand that opting out will not affect my future medical care.                                                                                             | YES <input type="checkbox"/> | NO <input type="checkbox"/> |
| I understand that sections of my medical notes may be looked at by study investigators at Tallaght Hospital. I give permission for these individuals to access my records. All information will be kept private and confidential.                                                                         | YES <input type="checkbox"/> | NO <input type="checkbox"/> |
| I agree for the entry of my clinical data into the registry. I give explicit informed consent for my data to be processed as part of this research study. I understand that my data will be securely coded and stored indefinitely.                                                                       | YES <input type="checkbox"/> | NO <input type="checkbox"/> |
| I agree to provide blood and (if applicable) cerebrospinal fluid samples for this study as described in the information leaflet. I understand that my samples will be securely coded and stored indefinitely. The risk of taking samples has been explained.                                              | YES <input type="checkbox"/> | NO <input type="checkbox"/> |
| I consent for my biological coded samples (including DNA) to be shared with authorised third parties including national and international institutions and academic institutions. I understand that this requires a legal materials transfer agreement between researchers at TUH and these institutions. | YES <input type="checkbox"/> | NO <input type="checkbox"/> |
| I agree to be contacted by researchers as part of this study                                                                                                                                                                                                                                              | YES <input type="checkbox"/> | NO <input type="checkbox"/> |
| I consent to undergo venepuncture for the purposes of this study                                                                                                                                                                                                                                          | YES <input type="checkbox"/> | NO <input type="checkbox"/> |
| I consent to participation in this research study having been fully informed of the risks, benefits and purpose of the study                                                                                                                                                                              | YES <input type="checkbox"/> | NO <input type="checkbox"/> |
| I consent to be contacted with regard to the possible use of my data and/or biological material for future research studies (with consent)                                                                                                                                                                | YES <input type="checkbox"/> | NO <input type="checkbox"/> |
| I understand that processing of my personal data, including transfer of data outside the EU, will be protected in accordance with the General Data Protection Regulation                                                                                                                                  | YES <input type="checkbox"/> | NO <input type="checkbox"/> |
| I understand that results from the analysis of my samples will not be given to me. I understand that there are no direct benefits to me and I will not benefit financially in any way.                                                                                                                    | YES <input type="checkbox"/> | NO <input type="checkbox"/> |

|                                      |  |
|--------------------------------------|--|
| Participant's Name (Block Capitals): |  |
| Participant's Signature:             |  |
| Date:                                |  |

To be completed by the **RESEARCHER**:

|                                                                                                                                                                                                                          |                              |                             |
|--------------------------------------------------------------------------------------------------------------------------------------------------------------------------------------------------------------------------|------------------------------|-----------------------------|
| I have fully explained the purpose and nature (including benefits and risks) of this study to the participant in a way that he/she could understand. I have invited him/her to ask questions on any aspect of the study. | YES <input type="checkbox"/> | NO <input type="checkbox"/> |
| I confirm that I have given a copy of the information leaflet and consent form to the participant and family member/carer.                                                                                               | YES <input type="checkbox"/> | NO <input type="checkbox"/> |

|                                      |  |
|--------------------------------------|--|
| Researcher's Name (Block Capitals):  |  |
| Researcher's Title & Qualifications: |  |
| Researcher's Signature:              |  |
| Date:                                |  |

For peer review only
